# Global analysis of aging-related protein structural changes uncovers enzyme polymerization-based control of longevity

**Authors:** Jurgita Paukštytė<sup>1,2</sup>, Rosa María López Cabezas<sup>1,2</sup>, Yuehan Feng<sup>3</sup>, Kai Tong<sup>1,2,4,5</sup>, Daniela Schnyder<sup>3</sup>, Ellinoora Elomaa<sup>1,2</sup>, Pavlina Gregorova<sup>2</sup>, Matteo Doudin<sup>1,2</sup>, Meeri Särkkä<sup>1,2</sup>, Jesse Sarameri<sup>1,2</sup>, Alice Lippi<sup>6</sup>, Helena Vihinen<sup>7</sup>, Juhana Juutila<sup>2,7</sup>, Anni Nieminen<sup>2,7</sup>, Petri Törönen<sup>2,7</sup>, Liisa Holm<sup>2,7</sup>, Eija Jokitalo<sup>7</sup>, Anita Krisko<sup>6</sup>, Juha Huiskonen<sup>7</sup>, L. Peter Sarin<sup>2</sup>, Ville Hietakangas<sup>2,7</sup>, Paola Picotti<sup>3,8</sup>, Yves Barral<sup>3</sup>, Juha Saarikangas<sup>1,2,7,9,\*</sup>

**Affiliations:** <sup>1</sup>Helsinki Institute of Life Science, HiLIFE, University of Helsinki; Helsinki, Finland. <sup>2</sup>Faculty of Biological and Environmental Sciences University of Helsinki; Helsinki, Finland. <sup>3</sup>Institute of Biochemistry, ETH Zurich; Zurich, Switzerland. <sup>4</sup>School of Biological Sciences, Georgia Institute of Technology; Atlanta, Georgia, United States. <sup>5</sup>Interdisciplinary Graduate Program in Quantitative Biosciences, Georgia Institute of Technology; Atlanta, Georgia, United States. <sup>6</sup>Department of Experimental Neurodegeneration, University Medical Center Göttingen; Göttingen, Germany. <sup>7</sup>Institute of Biotechnology, HiLIFE, University of Helsinki; Helsinki, Finland. <sup>8</sup>Institute of Molecular Systems Biology, ETH Zurich; Zurich, Switzerland. <sup>9</sup>Neuroscience Center, HiLIFE, University of Helsinki; Helsinki, Finland.

\*Correspondence: [juha.saarikangas@helsinki.fi](mailto:juha.saarikangas@helsinki.fi)

## Abstract:

Aging is associated with progressive phenotypic changes over time. Virtually all cellular phenotypes are produced by proteins and structural alterations in proteins can lead to age-related diseases. Nonetheless, comprehensive knowledge of proteins undergoing structural-functional changes during cellular aging and their contribution to age-related phenotypes is lacking. Here, we conducted proteome-wide analysis of early age-related protein structural changes in budding yeast using limited proteolysis-mass spectrometry. The results, compiled in online ProtAge-catalog, unravelled age-related functional changes in regulators of translation, protein folding and amino acid metabolism. Mechanistically, we found that folded glutamate synthase Glt1 polymerizes into supramolecular self-assemblies during aging causing breakdown of cellular amino acid homeostasis. Inhibiting Glt1 polymerization by mutating the polymerization interface restored amino acid levels in aged cells, attenuated mitochondrial dysfunction and led to life span extension. Altogether, this comprehensive map of protein structural changes enables identifying novel mechanisms of age-related phenotypes and offers opportunities for their reversal.

38 **Main Text:**

39 **Introduction**

40 The three-dimensional structures of proteins define how genetic information is translated into  
41 cellular biochemistries. As such, structural information of proteins is required to fully comprehend  
42 how cellular and organismal phenotypes arise<sup>1-4</sup>. Most proteins can occupy various structural  
43 states in different contexts. Variation can result, for example, from interactions with other  
44 molecules<sup>5,6</sup>, post-translational modifications<sup>7</sup>, fold switching<sup>8</sup>, unstructured regions<sup>9,10</sup> and  
45 condensation-reactions<sup>11,12</sup>. However, at present we know little of the diversity and dynamics of  
46 protein structural variation and even less about how it contributes to phenotypic diversity of cells  
47 and organisms.

48 Aging is a nearly universal biological process characterized by progressive phenotypic changes  
49 and increased mortality over time<sup>13,14</sup>. The rate of these changes is influenced by genetic variance,  
50 life history and environment. These variables can be experimentally controlled in model  
51 organisms, allowing for a more precise investigation of the mechanisms underlying aging  
52 phenotypes. For instance, the single-celled organism *Saccharomyces cerevisiae* starts to  
53 systematically display aging phenotypes during early stages of replicative aging that are not caused  
54 by mutations<sup>15-17</sup>. Such phenotypes include evolutionarily conserved aging hallmarks such as  
55 changes in cellular size<sup>18</sup>, metabolism<sup>19,20</sup>, organelle function<sup>21-23</sup> and the formation of protein  
56 aggregates<sup>24,25</sup>. Understanding how these and other phenotypic changes in aging arise can lead to  
57 the discovery of early causal mechanisms of cascading negative effects and thereby provide  
58 opportunities for interventions.

59 It is still not clear what gives rise to progressive phenotypic changes in aging. The prevailing theory  
60 is that molecular damage, for example due to free radicals<sup>13,26</sup> in conjunction with changes in the  
61 fidelity of epigenetic modifications<sup>27</sup>, transcription<sup>28,29</sup>, translation<sup>30-32</sup> and metabolism<sup>19</sup>,  
62 contributes to physiological changes in aging. In addition, aging is associated with alterations in  
63 the abundance, turnover or folding of proteins that are typically linked to defective protein  
64 homeostasis<sup>33-35</sup>. Folding changes in turn can lead to protein aggregation, which is a shared feature  
65 of aging across organisms and tissue types<sup>36,37</sup>, and is infamously linked to age-related  
66 neurodegenerative diseases<sup>38</sup>. However, it is currently unclear whether cellular aging results in  
67 other types of protein structural changes beyond aggregation. Thus, a more comprehensive  
68 characterization of protein structural states is required to understand the full breadth of proteome  
69 activity changes during aging and their contribution to adaptive and maladaptive age-related  
70 phenotypes.

71  
72 **Results**

73 ***Global analysis of aging-associated structural changes***

74 To identify aging-associated structural changes on a proteome-wide scale, we used magnetic-  
75 activated affinity purification to obtain fractions of young (av. age 0.6 divisions  $\pm$ 0.91 STD) and  
76 aged (av. age 4.2 divisions  $\pm$ 0.65 STD) budding yeast cells (**Fig. 1A**). Yeast cells aged for an  
77 average of 4.2 divisions represents mother cells that begin to systematically display aging  
78 phenotypes that are not caused by mutations<sup>15-17</sup>, enabling us to capture the underlying processes  
79 behind these age-related changes as they emerge. Such phenotypes include conserved aging  
80 hallmarks such as the appearance of protein aggregates and the declined function of organelles  
81 such as mitochondria and vacuoles<sup>21,22,25</sup>. The young cells represent rejuvenated daughter cells

(since aging factors are retained in the mother cell)<sup>15–17,39</sup>. We extracted native proteomes from young and aged cells, subjected them to limited proteolysis (LiP) via brief proteinase K treatment, followed by denaturation, trypsin digestion and mass spectrometry analysis (LiP-MS)<sup>40,41</sup>. A consequence of LiP is that protein structural features impact the cleavage patterns, enabling identification of age-related structural alterations in proteins at peptide-level resolution (**Fig. 1A**). To normalize the LiP-MS results for age-related changes in protein abundance, the same samples were also analyzed without the LiP step.

We considered that proteins with significant differences in proteolytic cleavage patterns normalized to their abundance between young and aged cells have undergone an aging-related structural change (collectively referred to hereafter as *age-altered proteins*) (**Fig. 1A**). LiP-MS enables reproducible identification of structural changes caused for example by alterations in protein folding, assembly state, interaction with other molecules or post-translational modifications, thereby offering a readout for age-associated changes in protein function<sup>3,40,42</sup>.

The global comparison of protein structural states between young and aged cells uncovered age-dependent structural differences in 468 proteins that comprised 1272 conformation-specific peptides (fold change q-value < 0.05 from sample triplicates, total proteins detected: 2833) (**Fig. 1A**). These conformotypic peptides identify the protein regions that changed structure during early aging. We mapped all structurally altered regions to their Alpha Fold-predicted three dimensional (3D) protein structures<sup>43</sup> and collected these results together with other relevant features into the online ProtAge-catalog (<https://protage-server-21.it.helsinki.fi/>) (**Fig. S1A**).

To uncover shared features of age-altered proteins, we compared the structurally altered proteome to the detected proteome that did not show significant structural changes (*unaltered proteins*). We found that age-altered proteins had on average more assigned gene ontology (GO) terms and protein-protein interactions, suggesting that these proteins are pleiotropic and participate in diverse cellular functions (**Fig. 1B-C, Fig. S1B**). GO enrichment analyses showed that regulators of metabolism, translation, protein folding and oxidative stress responses were overrepresented in the age-altered proteome (p.adj < 0.05 **Fig. 1D**). The age-altered proteins contained a larger fraction of essential genes and had a lower mutation rate than the unaltered proteins (**Fig. S1C-D**). Interestingly, even though the distribution of protein solubility was similar between age-altered proteins and the unaltered proteins (**Fig. S1E**), there was a strong enrichment for proteins that can transition into biomolecular condensates during stress<sup>44</sup>, including stress granule components (**Fig. 1E-F**). Moreover, age-altered proteins were strongly enriched in a class of long-lived proteins that are retained in the aging mother cells, suggesting that their retention is associated with an underlying structural change<sup>45</sup> (**Fig. 1G**). In addition to being long-lived, the age-altered proteins were more abundant than the unaltered proteins, which could be explained by the overall higher translation rate and lower number of degradation signals in these proteins (**Fig. S1F-H**). Finally, we found that decreased expression of genes encoding for the age-altered proteins in budding yeast or their homologs in *Caenorhabditis elegans* were more readily associated with life span extension as compared to the genes encoding for the unaltered proteins (**Fig. 1H**). Taken together, aging-associated structural changes are prevalent in pleiotropic regulators of metabolism, growth and stress responses that can transition between soluble and assembled states during stress.

### ***Structural changes identify activity changes in regulators of protein homeostasis***

Can the structural changes provide new insights in protein function during aging? We observed significant structural changes in all major chaperone classes, including members of Hsp40, Hsp70,

130 Hsp90, Hsp100, Hsp110 and TRiC/CCT proteins, which are interconnected and implicated in the  
131 maintenance of proteostasis during aging (**Fig. S2A**)<sup>33,34,46</sup>. The major Hsp70 isoform Ssa1  
132 availability is compromised during aging<sup>47</sup>, but how this decline in function relates to structure is  
133 unclear. To address this question, we mapped the structurally altered regions in Ssa1. Intriguingly,  
134 they clustered around two major sites undergoing activity-dependent structural changes during the  
135 Hsp70 allosteric cycle: the nucleotide binding domain (NBD) and the substrate binding domain  
136 (SBD)<sup>48</sup> (**Fig. 2A, Fig. 2B**). Moreover, all three full tryptic peptides localizing to the SBD showed  
137 significantly increased abundance in the aged cells as compared to young cells, suggesting that  
138 this region in SBD (residues 413-447) was less accessible for proteolytic cleavage in aged cells  
139 (**Fig. 2A**). To investigate whether the reduced accessibility of SBD reflects increased occupancy  
140 by clients, we performed a contact-site analysis using the substrate bound structure of bacterial  
141 Hsp70 DnaK. The proteolytically protected regions overlapped with the evolutionarily conserved  
142 residues that mediate critical hydrogen bonding and hydrophobic interactions with the clients<sup>49,50</sup>  
143 (**Fig. 2B**). These data are consistent with the increased client-binding of Ssa1 in aged cells, as  
144 previously measured by a decreased diffusion coefficient<sup>47</sup> and increased association with protein  
145 aggregates<sup>25</sup> (**Fig. 2C**). The results therefore provide validation of the ability of the LiP-MS  
146 approach to identify relevant aging-associated proteomic changes. Interestingly, the ribosome-  
147 associated Hsp70 proteins Ssb1 and Ssb2 and the endoplasmic reticulum Kar2/BiP showed a  
148 similar pattern of structural alterations in the SBD regions that overlapped with the client-binding  
149 site<sup>49,50</sup> (**Fig. S2C-H**), suggesting that aging might also lead to increased client occupancy of  
150 Hsp70s that govern nascent protein folding in cytoplasm and ER, respectively. Overall, we propose  
151 that the observed structural changes in Hsp70 proteins reflect an overall age-related increase in  
152 client occupancy, and this change may impact the proteostasis of cytosolic and ER residing  
153 proteins.

154  
155 One cause of compromised proteostasis during aging is altered protein translation accuracy<sup>31,32</sup>.  
156 Indeed, age-altered proteins were enriched in proteins regulating translation and tRNA  
157 aminoacylation and included some tRNA modifying enzymes (**Fig. 1D**). tRNA modifications  
158 regulate the kinetics and accuracy of translating ribosomes and thereby contribute to protein  
159 folding<sup>51</sup>. However, it is unknown whether specific tRNA modifications change during aging. We  
160 noticed that Trm1, which catalyzes N<sup>2</sup>,N<sup>2</sup>-dimethylguanosine (m<sup>2</sup>,<sup>2</sup>G) modification at a position  
161 G<sub>26</sub> in tRNAs, undergoes an age-related structural change that localized to the conserved Motif II  
162 (**Fig. 2D**). This motif is part of the methyl donor molecule binding pocket that is important for  
163 Trm1 catalytic activity. Contact site analysis revealed that the LiP-peptide directly overlaps with  
164 S-adenosyl-l-methionine (AdoMet) binding site and included the conserved Asp78 that mediates  
165 hydrophilic interaction with the ribose group of AdoMet<sup>52</sup> (**Fig. 2D-E, Fig. S3A**). The  
166 modification site specificity of Trm1 on tRNAs (**Fig. S3B**) enabled us to test whether the observed  
167 structural change corresponds to an activity change during aging. For this, we extracted tRNAs  
168 from young and aged cells and quantified the m<sup>2</sup>,<sup>2</sup>G modification by mass spectrometry.  
169 Interestingly, we found a significantly increased abundance of m<sup>2</sup>,<sup>2</sup>G in aged cells (**Fig. 2F**),  
170 consistent with increased occupancy of Trm1 active site in aged cells.

171  
172 Overall, we found structural changes in key proteins regulating proteostasis at the level of  
173 translation and folding, consistent with age-related increased substrate association. More  
174 generally, these results underline that LiP-MS can facilitate identification of specific age-related  
175 functional changes in proteins and guide their mechanistic analysis.

176  
177 ***Glutamate synthase Glt1 transitions to mesoscale assemblies during aging***

178 Amino acid metabolizing enzymes were the most overrepresented class of age-altered proteins  
179 (**Fig. 1D and SFig. 4A**). To evaluate if the structural changes impact function, we chose to examine  
180 whether age-altered metabolic enzymes show changes in subcellular localization or organization,  
181 we used fluorescence microscopy to visualize GFP-tagged versions of endogenous cytoplasmic  
182 amino acid synthesizing enzymes in young and aged cells. Most enzymes showed diffuse  
183 cytoplasmic localization with no detectable age-related changes (**Fig. S4B**). A subset of enzymes  
184 showed a punctate pattern, which in some cases appeared to be associated with localization to  
185 organelles (**Fig. S4C**). Intriguingly, unlike all other proteins in this class, the glutamate synthase  
186 Glt1 displayed a clear and systematic age-related localization change: in young cells Glt1 was  
187 diffusely distributed throughout the cytoplasm, but in aged cells that had undergone 4-6 divisions  
188 Glt1 had transitioned into large rod-shaped structures, which we show below are Glt1 polymers  
189 (**Fig. 3A-B, Fig. S4C, Movie S1**). The Glt1 polymers formed in a similar manner when tagged  
190 with either GFP or monomeric mKate2 fluorophores (**Fig. S4D**).

191  
192 Metabolic enzymes, including Glt1, were previously observed to form polymers in energy-starved,  
193 non-cycling cells<sup>53-56</sup>. The Glt1 structures resembled these polymers. However, the aged cells  
194 carrying Glt1 polymers were cycling normally (**Movie S1**). Live-cell imaging further revealed that  
195 Glt1 polymers were retained in the aging mother cells during cell division, and the daughter cells  
196 were born with diffuse Glt1 (**Fig. 3C, Movie S1**). The timing of appearance and mitotic  
197 segregation pattern of Glt1 assemblies resembled that of aging-associated aggregates<sup>25,47</sup>.  
198 However, Glt1-GFP polymers did not colocalize with Hsp104-labelled aggregates (**Fig. S4E**),  
199 indicating that Glt1 polymers do not have features of canonical aggregates.

200  
201 As Glt1 polymers did not appear to be aggregates, we investigated how their formation is  
202 regulated. We tested if Glt1 polymerization responds to availability of key nutrients by modulating  
203 the levels of glucose, nitrogen and amino acids. Interestingly, we found that Glt1 polymerization  
204 was affected by amino acid availability but not by limiting glucose or nitrogen (**Fig. 3D, Fig. S5A-**  
205 **B**). Incubating cells in growth medium lacking amino acids inhibited Glt1 polymer formation  
206 during replicative aging, whereas the addition of minimal amino acids for growth, methionine,  
207 histidine and leucine (minimal media, MM) was sufficient to restore polymer formation (**Fig. 3D**).  
208 Polymer formation was further increased by adding peptone as the source for all amino acids, or  
209 by using synthetic complete (SC) media, that contains most amino acids (see methods for details)  
210 (**Fig. 3D**). These data suggest that Glt1 polymerization during aging is a tunable reaction that is  
211 regulated by amino acid levels.

212  
213 To test if Glt1 polymers are reversible and can depolymerize, we used microfluidics-coupled live  
214 cell imaging and quantified the fate of preexisting Glt1 polymers upon acute removal of amino  
215 acids. Indeed, switching aged cells from rich SC media to amino acid-deprived media caused a  
216 systematic and progressive depolymerization of Glt1 polymers (**Fig. 3E-F**). Thus, Glt1  
217 polymerization in aged cells is reversible.

### 218 ***Glt1 polymerizes through self-association of symmetric complexes***

219  
220 To understand the nature of the Glt1 structures, we examined them using correlative light and  
221 transmission electron microscopy (CLEM). Importantly, the electron micrographs showed that the  
222 Glt1 polymers are composed of bundled filaments (**Fig. 3G**). This filamentous ultrastructure  
223 suggested that Glt1 assembly might occur at the polymer ends. To test this, we compiled a live-  
224 cell imaging assay to follow the fusion of two mating yeast cells carrying GFP- or mKate2-tagged  
225 versions of Glt1. By following the fate of distinct Glt1 polymers in the newly formed zygote, we



226 found that the two polymers were able to join at their distal ends in a stable manner, providing  
227 evidence that the Glt1 polymers can grow at the tips through the addition of new subunits (**Fig.**  
228 **3H**). To gain more insight into the polymerization dynamics, we measured polymer growth in  
229 individual cells over several hours (**Fig. 3I**). Fitting 76 polymer growth traces starting from their  
230 nucleation (distinguished as the first visible Glt1-GFP puncta) revealed a bi-phasic growth curve.  
231 In the initial 24-minute fast-growing state the doubling time of polymer elongation was 7.9  
232 minutes, which was followed by a 22-times slower growth phase (**Fig. 3J**). Together, these data  
233 indicate that Glt1 undergoes a rapid switch-like transition from diffuse to filamentous polymers  
234 during the early aging of budding yeast cells.

235

236 To understand the structural basis of Glt1 polymerization, we modelled the yeast Glt1 structure  
237 based on the structure of the homologous *Azospirillum brasilense* GltS, which consists of two  
238 subunits that assemble into a hexameric oligomer with threefold dihedral (D3) symmetry<sup>57</sup>. We  
239 found that the three LiP-MS identified Glt1 peptides that were protected from proteolytic cleavage  
240 in aged cells localized on the three-fold symmetric face of the GltS structure (**Fig. 3K**). We  
241 hypothesized that this face represents the polymerization interface mediating Glt1 self-assembly  
242 and becomes protected from proteolytic cleavage when Glt1 is polymerized. To test this  
243 hypothesis, we performed site-directed mutagenesis focusing on the LiP-MS identified region (LiP  
244 1). Surface hydrophobicity can mediate the self-assembly of symmetric protein complexes<sup>58</sup>, and  
245 we found that exchanging surface exposed hydrophobic residues for polar residues compromised  
246 Glt1 polymerization during aging (**Fig. 3L-M, Fig. S5C**). We focused on mutant 3 (H1537A,  
247 Y1538N, L1539S, henceforth *GLT1-MUT*) and validated that it displayed similar expression and  
248 catalytic activity as wild type Glt1 (**Fig. S5D-G**), demonstrating that the mutation does not prevent  
249 polymerization through adverse effects on Glt1 expression or folding. Overall, our data suggest  
250 that Glt1 filaments form during aging via the polymerization of hexameric (D3 symmetry) or  
251 trimeric (cyclic, C3 symmetry) Glt1 homomers (**Fig. 3N, Fig. S5H-I**).

252

### 253 ***Inhibiting Glt1 polymerization delays aging, prevents intracellular amino acid accumulation*** 254 ***and attenuates mitochondrial dysfunction***

255 Several metabolic enzymes undergo reversible polymerization as an adaptive response to changes  
256 in the environment<sup>59,60</sup>. We considered whether age-related Glt1 polymerization is an adaptation  
257 that impacts cellular longevity. To test this, we compared the replicative life span of wild type cells  
258 to that of CRISPR-Cas9-edited cells expressing non-polymerizing *GLT1-MUT*. Interestingly,  
259 microdissection mediated life span analysis revealed that the polymerization-deficient *GLT1-MUT*  
260 cells displayed a 20 % extension in median life span as compared to the wild type cells ( $p < 0.05$ ,  
261 **Fig. 4A**). These data suggest that the Glt1 transition from the diffuse to polymerized form may  
262 promote aging in yeast cells.

263

264 To understand the role of Glt1 polymerization in aging and overall cellular function, we first  
265 compared the transcriptome of young and aged wild type and *GLT1-MUT* cells using RNA  
266 sequencing (**Fig. 4B**). We observed 814 genes with altered expression in aged wild-type versus  
267 *GLT1-MUT* cells, whereas the expression of only 11 genes was altered between young cells where  
268 Glt1 is soluble (**Fig. S6A**). Gene set enrichment analysis of the 814 genes showed significant  
269 differences in metabolic processes, with amino acid metabolism representing the second most  
270 significant GO-category (**Fig. S6B**). Together with the sensitivity of Glt1 polymerization to amino  
271 acid levels, this suggested that the Glt1 polymerization status is coupled to amino acid metabolism.  
272 We explored this further via targeted LC-MS metabolic analyses of young and aged wild type and  
273 *GLT1-MUT* cells (**Fig. 4B**). Principal component analysis (PCA) of the steady-state metabolome

274 showed that aged wild-type cells clustered away from young wild-type cells, indicating that aging  
275 correlates with changes in cellular metabolism (**Fig. 4C**). Interestingly, aged wild-type cells  
276 carrying Glt1 polymers were the most distal cluster from the young cells and segregated away  
277 from the aged *GLT1-MUT* cells, indicating that aged yeast cells with Glt1 polymers have a distinct  
278 metabolic phenotype. Notably, young wild-type and *GLT1-MUT* samples co-clustered (**Fig. 4C**),  
279 which, together with the RNA seq data (**Fig. S6A**), further demonstrate that the H1537A, Y1538N,  
280 L1539S substitutions affect polymerization but do not alter the function of soluble Glt1.

281  
282 We examined metabolites by performing an orthogonal partial least square (OPLS) analysis and  
283 observed increased amino acid levels and reduced mitochondrial TCA cycle metabolites in aged  
284 wild-type cells relative to aged *GLT1-MUT* cells (**Fig. 4D-E**). Indeed, the steady-state levels of  
285 amino acids increased up to 7-fold during aging in wild-type cells but not in *GLT1-MUT* cells (**Fig.**  
286 **4F**). We confirmed that these differences cannot be explained by changes in cell size between the  
287 wild type and mutant cells (**Fig. S7A**). It was recently shown that loss of vacuolar acidification  
288 leads to overflow of cytosolic amino acids in aged yeast cells<sup>22,61</sup>. We found that 8 out of 14 of  
289 vacuolar V-ATPase subunits displayed a structural change during aging, in line with a potential  
290 change in its function during aging. Thus, we tested if Glt1 polymerization is associated with  
291 vacuolar decline. However, Glt1 polymerization status did not affect vacuolar pH (**Fig. S7B**).  
292 Furthermore, inhibiting vacuolar ATPase with concanamycin A (ConcA) did not induce Glt1  
293 polymerization (**Fig. S7C**). We conclude that Glt1 polymerization-associated increase in  
294 cytoplasmic amino acids is not associated with vacuolar decline.

295  
296 To understand the origin of the increased amino acids, we performed a tracing analysis, growing  
297 cells with <sup>13</sup>C<sub>5</sub>-<sup>15</sup>N<sub>2</sub> isotope-labelled glutamine for 30 min (**Fig. 4B**). Glt1 catalyzes the transfer of  
298 one amino group from a glutamine molecule to alpha-ketoglutarate, generating two glutamate  
299 molecules while NADH is oxidized in the process (**Fig. 4G**). We thus quantified the fraction of  
300 labelled glutamate derived from the Glt1 reaction relative to the rest of the labelled glutamate  
301 species derived from the Gdh1 and Gdh3 reactions. We found no differences in labelled glutamate  
302 levels between young and aged wild type or *GLT1-MUT* cells (**Fig. 4H, Fig. S7E-F**), suggesting  
303 that Glt1 retains its catalytic activity when it is polymerized. However, we observed that glutamine  
304 uptake was significantly increased in aged wild-type cells that carried Glt1 polymers (**Fig. 4I, Fig.**  
305 **S7E, G**).

306  
307 These results suggested that the increase in amino acid levels may be mediated via differential  
308 uptake of glutamine and possibly other amino acids. Indeed, our RNA-seq identified amino acid  
309 transporters as a significantly altered GO-cluster between aged wild-type and *GLT1-MUT* cells (p  
310 adj.< 0.05) (**Fig. S6B**). To test whether increased glutamine import is linked to increased  
311 expression of glutamine transporters, we measured the expression of broad-specificity amino acid  
312 transporters Gnp1, Dip5 and Gap1 in young and aged wild-type and *GLT1-MUT* cells.  
313 Interestingly, Gnp1 and Dip5 displayed approximately 2-fold higher protein expression in the aged  
314 wild-type as compared to *GLT1-MUT* cells whereas no changes were detected in Gap1 (**Fig. S8A**).  
315 Gnp1 has high affinity for glutamine<sup>62</sup>. In accordance with our metabolic analysis, we found that  
316 the expression of Gnp1 increased with age, and its levels in wild-type cells were significantly  
317 higher than in *GLT1-MUT* cells (**Fig. S8B-C**). We propose that Glt1 polymerization contributes to  
318 increased expression of amino acid transporters, including Gnp1, to promote the uptake of  
319 glutamine and likely other amino acids in aged cells (**Fig. 4J**).

320

321 Aged cells showed an accumulation of many amino acids (**Fig. 4F**). Since glutamine can serve as  
322 an amino group donor for the synthesis of other amino acids, we examined whether aged cells  
323 utilize excess glutamine to synthesize other amino acids (**Fig. S7D**). Briefly, we used the tracing  
324 data to monitor the transfer of the labelled amino group derived from glutamine. Importantly, a  
325 comparison of <sup>15</sup>N-labelled amino acids between wild-type and *GLT1-MUT* cells showed a  
326 significant increase of labelled phenylalanine in aged wild-type cells, but not in aged *GLT1-MUT*  
327 cells or young cells (**Fig. 4J**). A similar trend was observed in leucine/isoleucine (**Fig. 4K**). These  
328 data provide evidence that Glt1 polymerization-mediated glutamine uptake contributes to the  
329 accumulation of other amino acids, particularly phenylalanine. Altogether, these data indicate that  
330 Glt1 polymerization is associated to large scale metabolic and transcriptomic rearrangements  
331 during aging that lead to amino acid accumulation in aged cells and a shortened life span.  
332

333 We therefore wanted to understand how the Glt1 polymerization-associated metabolic  
334 rearrangements in aged cells relate to the regulation of longevity. To first understand how Glt1  
335 polymerization relates to aging (**Fig. 4A**), we inspected mortality rates to determine at which  
336 timepoint *GLT1-MUT* cells begin to diverge from wild-type cells. We found that *GLT1-MUT*  
337 specifically impacted early mortality, in line with the timing of initial polymer formation (**Fig.**  
338 **S9A**).

339  
340 Mitochondria function begins to decline during early aging in budding yeast<sup>21,22</sup>. Importantly, this  
341 decline in mitochondrial function is associated with an overflow of cytosolic amino acids<sup>22,61,63</sup>.  
342 Thus we measured mitochondrial membrane potential in young and aged cells as a proxy for  
343 mitochondrial fitness<sup>64</sup> (**Fig. S9B**), and found that mitochondrial membrane potential declined  
344 with age, as expected<sup>21,22</sup> (**Fig. 4L and Fig. S9C**). In contrast, the non-polymerizing *GLT1-MUT*  
345 cells maintained high mitochondrial membrane potential during the early phases of aging (**Fig. 4L**  
346 **and Fig. S9C**). Moreover, mitochondria were fragmented nearly twice as often in aged wild type  
347 cells (9.7 %) as compared to aged *GLT1-MUT* cells (5.1 %) (**Fig. S9D**). We did not detect  
348 significant differences in mitochondrial respiration by oxygraphy measurements at this point,  
349 probably since most cells are fermenting in these conditions (**Fig. S9E**). We considered an option  
350 where the decline in mitochondrial membrane potential could itself act as a signal to promote Glt1  
351 polymerization. To test this, we reduced mitochondrial membrane potential by treating cells with  
352 carbonyl cyanide m-chlorophenyl hydrazone (CCCP), but this treatment had no effect on Glt1  
353 polymerization (**Fig S9F**). The combined data suggest that polymerization does not depend on  
354 mitochondrial dysfunction, but that lack of polymerization can counteract mitochondrial  
355 dysfunction in aging cells.  
356

357 Finally, we addressed the connection between Glt1 polymerization state and mitochondrial  
358 decline, testing the role of amino acid accumulation. We measured mitochondrial membrane  
359 potential in cells grown under moderate (SD media) and high (SD media + peptone) amino acid  
360 conditions that cause an elevation in intracellular amino acids, mimicking the effect of Glt1  
361 polymerization in aged cells (**Fig. 4F**). Remarkably, culturing cells in high amino acid conditions  
362 reduced mitochondrial membrane potential in all cell populations, abolishing both age- and  
363 polymerization-associated differences (**Fig. 4M**). We infer that Glt1 polymerization compromises  
364 mitochondrial membrane potential via the elevation of intracellular amino acids.  
365

## 366 Discussion

367 Our findings demonstrate that mapping protein structural changes is a powerful way to identify  
368 mechanisms associated with cellular aging, which would have not been detectable with prevailing



369 techniques that only quantify changes in transcriptome and proteome abundance. Since more than  
370 80 percent of the structurally altered proteins have human homologs and showed enrichment for  
371 genes modulating life span in multicellular *C. elegans*, the dataset has the potential to be broadly  
372 applicable.

373

374 The age-altered proteins identified in this study were enriched in essential, multifunctional proteins  
375 that occupied central positions in protein-protein interaction networks. Another interesting feature  
376 was the strong enrichment in proteins that can reversibly transition into condensates. Such proteins  
377 have emerged as major regulators of adaptive cellular responses that may adopt aberrant  
378 conformations during aging and age-related diseases<sup>11,12,65</sup>. A subtype of condensates not  
379 previously linked to aging are structurally ordered polymeric assemblies made by metabolic  
380 enzymes. We show that surface-exposed hydrophobic residues mediate the self-assembly of  
381 symmetric Glt1 homomers during aging. The overall assembly mechanism of Glt1 is similar to  
382 that of several other homo-oligomeric proteins with internal symmetry<sup>58,66</sup>, suggesting that cell  
383 intrinsic alterations in aging might increase the self-association potential of a broader range of  
384 proteins. It is not yet clear why aging leads to Glt1 polymerization. We provide evidence that the  
385 polymerization is reversible and sensitive to amino acids, perhaps reflecting an allosteric sensing  
386 mechanism. Additional cues affecting Glt1 polymerization may include potential changes in the  
387 intracellular pH<sup>55,67</sup>.

388

389 We provide evidence that the Glt1 assemblies fulfill the criteria of being *bona fide* aging factors:  
390 1. They form in response to aging, 2. They are asymmetrically segregated between aged mother  
391 cells and rejuvenating daughter cells, and 3. Preventing their formation extends life span<sup>15,39</sup>. Our  
392 data show that Glt1 polymerization is associated with accumulation of amino acids suggesting that  
393 at least two separate pathways contribute to age-associated amino acid overflow: defective  
394 vacuolar compartmentalization<sup>22,61</sup> and Glt1 polymerization-mediated amino acid uptake and  
395 glutamine transamination. We found that amino acid accumulation is linked to mitochondrial  
396 dysfunction, potentially affecting the TCA cycle and mitochondrial iron-sulfur cluster proteins  
397<sup>61,63</sup>. Why then has polymerization been selected by evolution? In the wild, yeast cells do not grow  
398 in test tubes but in colonies formed by interactive communities where cells may engage in cross-  
399 generational amino acid exchange between young and aged cells<sup>68</sup>. Thus, Glt1 polymerization  
400 could be an example of antagonistic pleiotropy that has evolved for the benefit of the community,  
401 but at the cost of aging of the individual cell.

402

403 In addition to affecting the mitochondria, we propose that age-related amino acid accumulation  
404 can lead to structural-functional alterations in proteins interacting with amino acids. For instance,  
405 67 % of cytosolic aminoacyl-tRNA synthetases displayed structural changes during aging. This  
406 might reflect altered binding status to cognate amino acids, potentially affecting tRNA charging  
407 and fidelity of protein translation. Indeed, translation fidelity is important for life span regulation  
408 in eukaryotes<sup>31</sup> in part by overwhelming the proteostasis machinery<sup>32,51</sup>. Our data support such a  
409 chain of events. We provide evidence that ribosome-associated Hsp70 chaperones involved in  
410 folding of nascent polypeptide chains are increasingly occupied by client interactions during aging.  
411 Similar changes were found in the ER Hsp70 Kar2/BiP and cytosolic Hsp70 Ssa1, likely reflecting  
412 increased occupancy of these chaperones by client proteins and their compartmentalization to  
413 aging cells<sup>25,47,69</sup>. Such chaperone sequestering may lead to proteostasis collapse during later  
414 stages of aging<sup>47,70</sup>.

415 Taken together, understanding the landscape of protein structural changes during aging provides  
416 opportunities to build novel hypotheses on how age-associated cellular changes at the pathway  
417 level with mechanistic precision.

418

### 419 **Limitations of the study**

420 Our approach has some limitations that constrain the conclusions of our study. Our samples  
421 comparing two timepoints in aging limit the conclusions to early aging processes. Even though  
422 this is arguably the most informative way for capturing primary changes associated with aging, it  
423 will be important in the future to construct a more comprehensive temporal map of aging-  
424 associated protein structural changes. Although our data exposed known and novel processes  
425 related to aging, some of the detected changes can also derive from differences between the mother  
426 and daughter cells that are not related to aging *per se*<sup>71</sup>. The proteome coverage in our LiP-MS  
427 analysis was 62.7 % of the expressed yeast proteome<sup>72</sup>, so our study excludes a portion of the  
428 proteome, primarily consisting of low abundant proteins. Furthermore, owing partially to the  
429 limited resolution of the LiP-MS method, interpreting the nature of the structural change can be  
430 challenging, as they can be associated with various causes, for example altered interactions,  
431 folding or assembly change. Therefore, combining structural proteomics with secondary imaging-  
432 based approaches<sup>73</sup> could be a powerful approach, as shown also in this study for a limited set of  
433 proteins (Fig. S3). Finally, one intriguing challenge in the future is to gain a more comprehensive  
434 understanding of how Glt1 polymerization is regulated and how it inflicts transcriptomic and  
435 metabolic changes in aged cells.

436  
437  
438  
439  
440  
441  
442  
443  
444  
445  
446  
447  
448  
449  
450  
451  
452  
453  
454  
455  
456  
457  
458  
459  
460  
461  
462  
463  
464  
465  
466  
467  
468  
469  
470  
471  
472  
473  
474  
475  
476  
477  
478  
479  
480  
481  
482  
483

## Main figure legends

### Figure 1. Identification of age-related structural changes in pleiotropic regulators of cell metabolism, growth, and stress responses

- A.** Overview of workflow to identify age-related protein structural changes using LiP-MS.
- B.** Number of GO functions in age-altered proteins (light blue) compared to unaltered proteins (grey).
- C.** Number of protein-protein interactions in age-altered proteins ( $n = 460$ ) (light blue) compared to unaltered proteins ( $n = 2279$ ) (grey). Black line in box plots in (B-C) is median and whiskers mark 10 and 90 percentile values.
- D.** Gene ontology (GO) enrichment by over-representation analysis of age-altered proteins compared to unaltered proteins. The size of dots in the plot represents the number of proteins for every biological process. The color change from blue to red signify the size of adjusted  $P$  value ( $P$  adjusted  $< 0.05$ ).
- E.** Fraction of aggregating proteins and superaggregators among age-altered proteins ( $n = 468$ ) (light blue) and unaltered proteins ( $n = 2332$ ) (grey).
- F.** Fraction of stress granules forming proteins among age-altered proteins ( $n = 468$ ) (light blue) compared to unaltered proteins ( $n = 2332$ ) (grey).
- G.** Fraction of asymmetrically retained long-lived proteins (LARPs) among age-altered proteins ( $n = 468$ ) (light blue) compared to unaltered proteins ( $n = 2332$ ) (grey).
- H.** Fraction of genes whose decreased expression extends lifespan in age-altered ( $n = 468$ ) (light blue) and unaltered proteins ( $n = 2332$ ) (grey) or their homologs in *S. cerevisiae* and *C. elegans*. Statistical significance was assessed with Fisher's exact test and effect size in (B-C) is displayed as common language effect size (CLES) and in (E-H) as odds ratio (OR).  $**P < 0.01$ ;  $****P < 0.0001$ .

### Figure 2: Structural alterations indicate age-related protein activity changes in regulators of proteostasis

- A.** Cartoon representation of ADP-bound 'open' Hsp70 with the nucleotide binding domain in gray and the substrate binding domain (SBD) in light green (PDB:2KHO; <sup>74</sup>). Close-up of the SBD with Ssa1 LiP-peptides mapped in red and the peptide substrate in yellow (PDB:1DKX; <sup>49</sup>).
- B.** The chord plot depicts contacts between LiP peptide (red) and client peptide (orange) based on (PDB:1DKX). The inner arcs display the contacting secondary structures.
- C.** Representative images of young and aged cells expressing Ssa1 tagged with GFP show association of Ssa1 with protein aggregates in aged cells (arrowhead). Cell age can be determined from bud scars on cell wall stained with calcofluor (magenta). Scale bar 2  $\mu\text{m}$ .
- D.** Cartoon structure of *Pyrococcus horikoshii* Trm1. LiP-peptide depicted in red and AdoMet in yellow. Close up showing two AdoMet interacting residues Asp78 and Ile79. (PDB: 2EJT; <sup>52</sup>).
- E.** Chord plot displays contacts between LiP peptide-region (red) and AdoMet (yellow). The inner arcs depict contacting secondary structures.
- F.** Levels of N<sup>2</sup>,N<sup>2</sup>-dimethylguanosine (m<sup>2</sup>,<sup>2</sup>G) modified tRNA increase in aged (mean age 4.4 divisions) cells compared to young (mean age 0.1 divisions) cells. TRNA levels were identified by mass spectrometry and normalized to an internal <sup>15</sup>N-guanosine standard. Significance was determined with two tailed unpaired t-test with Welch's correction.  $n = 2$ .  $**P < 0.01$ .

### Figure 3: Glutamate synthase Glt1 forms filamentous polymers during aging

- A.** Endogenous Glt1 tagged with GFP is soluble in young cells but forms a fiber-like polymers in aged cells. Scale bar 1  $\mu\text{m}$ .

- 484 **B.** Quantification of cells bearing Glt1 polymers between young (0-1 divisions,  $n = 681$ ) and aged  
485 (4-6 divisions,  $n = 82$ ) cells.
- 486 **C.** Quantification of inheritance of Glt1 polymers by mother or daughter cells during cell division  
487 by live-cell imaging.  $n = 364$ .
- 488 **D.** Quantification of cells with Glt1 polymers in varying amino acid conditions: no amino acids  
489 (no AA), with peptone (no AA + peptone) and synthetic complete media (SC).  $n = 3$ .
- 490 **E.** representative time-lapse images from microfluidics-coupled microscopy analysis of Glt1-GFP  
491 (green) polymer over time after switching to amino acid deprived media. Scale bar 1  $\mu\text{m}$ .
- 492 **F.** Quantification of Glt1 polymer dynamics over time after switching to media without amino  
493 acids.  $n = 40$ .
- 494 **G.** Correlative light-electron microscopy image of Glt1-GFP (green) polymer bearing cell detected  
495 with fluorescence microscopy and subsequently visualized by transmission electron microscopy  
496 (TEM). Area of Glt1 polymer denoted with the box. Scale bar is 1  $\mu\text{m}$  and in the zoom-in EM  
497 image (right) 200 nm.
- 498 **H.** Mating cells carrying Glt1 polymers tagged with mKate2 (red) or GFP (green). Time lapse  
499 images of a stable co-assembly of two polymers. Scale bar 2  $\mu\text{m}$ .
- 500 **I.** Time-lapse microscopic evaluation of Glt1-GFP polymer assembly. Scale bar 1  $\mu\text{m}$ .
- 501 **J.** Dynamics of Glt1 polymer assembly was assessed by measuring the length of assemblies in  
502 individual cells over 345 min after nucleation and plotted with two-phase association model,  
503 showing duplication time for fast 7,943 min ( $\text{HalfLife}_{\text{FAST}}$ ) and slow 175.6 min ( $\text{HalfLife}_{\text{slow}}$ )  
504 states. Red line displaying model fit ( $R^2 = 0.53$ ).  $n = 77$ .
- 505 **K.** Table summarizing identified LiP peptides in Glt1 and visualized in a structural model of yeast  
506 Glt1 hexamer (PDB: 2VDC; <sup>57</sup>).
- 507 **L.** Color-coded representation of mutated residues in a Glt1 structural model. Table summarizes  
508 the effect of the different mutants on Glt1 polymerization.
- 509 **M.** Representative images wild type and Glt1 H1537A, Y1538N, L1539S mutant cells tagged with  
510 GFP. Scale bar 1  $\mu\text{m}$ .
- 511 **N.** Cartoon model of putative polymerization mechanism of Glt1 with dihedral symmetry (D3).  
512 Error bars in the graphs represent  $\pm$  SD. Statistical significance was assessed with two tailed  
513 unpaired t test (B-C) or one-way ANOVA with Dunnett's correction. \* $P < 0.05$ ; \*\* $P < 0.01$ , \*\*\*\* $P$   
514  $< 0.0001$ .

515  
516 **Figure 4: Glt1 polymerization is reversible and promotes accumulation of intracellular**  
517 **amino acids**

- 518 **A.** Replicative life span comparison between WT and *GLT1-MUT* cells. The median life span is  
519 displayed on the graph.  $n_{\text{wt}} = 40$ ,  $n_{\text{GLT1-MUT}} = 62$ . Statistical significance was assessed with Mantel-  
520 Cox test.
- 521 **B.** Workflow for comparing transcriptomics and metabolomics. Purified fractions of young and  
522 aged cells were subjected to RNAseq and steady-state metabolomics analysis or grown with  
523 labelled  $^{13}\text{C}_5^{15}\text{N}_2$ -glutamine for tracing analysis.
- 524 **C.** Principal component analysis (PCA) of steady-state metabolomics. Young cell clusters  
525 encircled with dotted lines, aged cell clusters with solid lines.  $n = 4$ .
- 526 **D.** Differences in steady-state metabolites between WT and *GLT1-MUT* are summarized in  
527 orthogonal partial least square (OPLS) analysis.  $n = 4$ .
- 528 **E.** Feature importance graph of OPLS indicating metabolites and their weight with VIP score  
529 between aged WT and *GLT1-MUT* (yellow higher and turquoise lower metabolites levels between  
530 two groups).  $n = 4$ .
- 531 **F.** Fold change in steady-state amino acid levels with age in WT and *GLT1-MUT* cells  $n = 4$ .



- 532 **G.** Reaction catalyzed by Glt1.
- 533 **H.** The fractional contribution of labelled glutamate from Glt1 reaction.  $n = 4$ .
- 534 **I.** Fractional contribution of labelled  $^{13}\text{C}_5\text{-}^{15}\text{N}_2$ -glutamine uptake.  $n = 4$ .
- 535 **J.** Utilization of labelled  $^{13}\text{C}_5\text{-}^{15}\text{N}_2$ -glutamine for phenylalanine (Phe) synthesis via transamination  
536 is shown by a ratio of labelled  $^{13}\text{C}_5\text{-}^{15}\text{N}_2$ -glutamine to  $^{15}\text{N}$ -labelled Phe.  $n = 4$ .
- 537 **K.** Utilization of labelled  $^{13}\text{C}_5\text{-}^{15}\text{N}_2$ -glutamine for isoleucine/leucine (Ile/Leu) synthesis via  
538 transamination shown by a ratio of labelled  $^{13}\text{C}_5\text{-}^{15}\text{N}_2$ -glutamine to  $^{15}\text{N}$ -labelled Ile/Leu.  $n = 4$ .
- 539 **L.** Age-dependent analysis of mitochondrial membrane potential between WT and *GLT1-MUT*  
540 cells. Correlation coefficient (R) and its significance was computed with standard Pearson's  
541 correlation test where the dots represent single cells and line indicates the linear regression curve.  
542  $n_{WT} = 216$ ,  $n_{GLT1-MUT} = 154$ .
- 543 **M.** Quantification of MitoLoc signal in normal and high amino acid conditions in WT and *GLT1-*  
544 *MUT* cells.  $n_{WT} = 186$ ,  $n_{GLT1-MUT} = 149$ , at least 25 cells per subgroup was analyzed from 3  
545 biological replicates. Error bars represent mean  $\pm$  SD. Statistical significance in (H-K) was  
546 assessed with ordinary one-way ANOVA with Dunnett's correction and in M with three-way  
547 ANOVA with Šidák's correction. \* $P < 0.05$ ; \*\* $P < 0.01$ ; \*\*\* $P < 0.001$  \*\*\*\* $P < 0.0001$ ; n.s. not  
548 significant.

549

## Key resources table

| REAGENT or RESOURCE                                                              | SOURCE                         | IDENTIFIER                       |
|----------------------------------------------------------------------------------|--------------------------------|----------------------------------|
| <b>Antibodies</b>                                                                |                                |                                  |
| mouse 6x-His Tag Monoclonal Antibody (HIS.H8)                                    | Thermo Fisher Scientific       | MA1-21315<br>RRID:AB_2536988     |
| mouse Anti- $\beta$ -actin [8F10-G10]                                            | Abcam                          | ab1700325<br>RRID:AB_2893492     |
| rabbit Anti-PGK1 polyclonal antibody                                             | Thermo Fisher Scientific       | PA5-28612<br>RRID:AB_2546088     |
| mouse Anti-GFP monoclonal antibody                                               | Merck                          | 11 814 460 001<br>RRID:AB_390913 |
| Rabbit Anti-Mouse HRP                                                            | Invitrogen                     | A16166<br>RRID:AB_2534837        |
| Goat anti-Rabbit HRP                                                             | Invitrogen                     | A27036<br>RRID:AB_2536099        |
| <b>Bacterial and virus strains</b>                                               |                                |                                  |
| <i>Escherichia coli</i> DH5 $\alpha$                                             | Zymo Research                  | Mix & Go, CAT #T3007             |
| <b>Chemicals, peptides and recombinant proteins</b>                              |                                |                                  |
| DnpI                                                                             | Thermo Fisher Scientific       | Cat #ER1701                      |
| EZ-link <sup>TM</sup> Sulfo-NHS-LC-Biotin                                        | Thermo Fisher Scientific       | Cat #21335                       |
| Streptavidin MicroBeads                                                          | Miltenyi Biotec                | Cat #130-048-101                 |
| Fluorescent brightener 28 (Calcofluor)                                           | Sigma-Aldrich                  | Cat # F3543                      |
| Concanavalin A                                                                   | Sigma-Aldrich                  | Cat # C2010                      |
| carbonyl cyanide 3-chlorophenylhydrazone CCCP                                    | Sigma-Aldrich                  | Cat #C2759                       |
| <sup>13</sup> C <sub>5</sub> <sup>15</sup> N <sub>2</sub> -Gln (CNLM-1275-PK)    | Cambridge isotope laboratories | CNLM-1275-H-PK                   |
| 100 mg/ml salmon sperm DNA                                                       | Sigma-Aldrich                  | Cat #D7656                       |
| Zymolyase 20T                                                                    | Amsbio                         | Cat #120491-1                    |
| Concanamycin A                                                                   | Santa Cruz Biotechnology       | sc-202111                        |
| 2',7'-Bis(2-carboxyethyl)-5(6)-carboxyfluorescein acetoxymethyl ester (BCECF/AM) | Sigma-Aldrich                  | B8806                            |
| Monensin Sodium salt                                                             | Sigma-Aldrich                  | M5273                            |
| Nigericin Sodium salt                                                            | Sigma-Aldrich                  | SML-1779                         |
| Streptavidin, Alexa Fluor <sup>TM</sup> 633 conjugate                            | Thermo Fisher Scientific       | Cat #S21375                      |
| <b>Critical commercial assays</b>                                                |                                |                                  |
| Easy Clone 2.0 Yeast ToolKit                                                     | Addgene                        | Kit #1000000073                  |
| Pierce <sup>TM</sup> BCA Protein Assay Kit                                       | Thermo Fisher Scientific       | Cat #23225                       |

|                                                                                                                                                                |               |            |
|----------------------------------------------------------------------------------------------------------------------------------------------------------------|---------------|------------|
| Direct-zol RNA Miniprep Kit                                                                                                                                    | Zymo Research | Cat #R2051 |
| <b>Experimental models: Organisms/strains</b>                                                                                                                  |               |            |
| WT BY4741: MATa his3Δ1 leu2Δ0 met15Δ0 ura3Δ0                                                                                                                   | <sup>75</sup> |            |
| WT Mother Enrichment Program (MEP) MATa ade2::hisG his3 leu2 lys2 ura3D0 trp1D63 hoD::SCW11pr-Cre-EBD78-NatMX loxP-UBC9-loxP-LEU2 loxP-CDC20-Intron-loxP-HPHMX | <sup>76</sup> |            |
| BY4741: MATa his3Δ1 leu2Δ0 met15Δ0 ura3Δ0 ASN1-GFP:HIS3                                                                                                        | <sup>77</sup> |            |
| BY4741: MATa his3Δ1 leu2Δ0 met15Δ0 ura3Δ0 ASN2-GFP:HIS3                                                                                                        | <sup>77</sup> |            |
| BY4741: MATa his3Δ1 leu2Δ0 met15Δ0 ura3Δ0 BAT2-GFP:HygMX                                                                                                       | This study    |            |
| BY4741: MATa his3Δ1 leu2Δ0 met15Δ0 ura3Δ0 CAR1-GFP: HygMX                                                                                                      | This study    |            |
| BY4741: MATa his3Δ1 leu2Δ0 met15Δ0 ura3Δ0 CAR2-GFP: HygMX                                                                                                      | This study    |            |
| BY4741: MATa his3Δ1 leu2Δ0 met15Δ0 ura3Δ0 CYS3-GFP: HygMX                                                                                                      | This study    |            |
| BY4741: MATa his3Δ1 leu2Δ0 met15Δ0 ura3Δ0 CYS4-GFP: HygMX                                                                                                      | This study    |            |
| BY4741: MATa his3Δ1 leu2Δ0 met15Δ0 ura3Δ0 GDH1-GFP: HygMX                                                                                                      | This study    |            |
| BY4741: MATa his3Δ1 leu2Δ0 met15Δ0 ura3Δ0 GDH2-GFP:HIS3                                                                                                        | <sup>77</sup> |            |
| BY4741: MATa his3Δ1 leu2Δ0 met15Δ0 ura3Δ0 GLT1-GFP:HIS3                                                                                                        | <sup>77</sup> |            |
| BY4741: MATa his3Δ1 leu2Δ0 met15Δ0 ura3Δ0 GLY1-GFP: HygMX                                                                                                      | This study    |            |
| BY4741: MATa his3Δ1 leu2Δ0 met15Δ0 ura3Δ0 HOM2-GFP: HygMX                                                                                                      | This study    |            |
| BY4741: MATa his3Δ1 leu2Δ0 met15Δ0 ura3Δ0 HOM6-GFP: HygMX                                                                                                      | This study    |            |
| BY4741: MATa his3Δ1 leu2Δ0 met15Δ0 ura3Δ0 ILV6-GFP: HygMX                                                                                                      | This study    |            |
| BY4741: MATa his3Δ1 leu2Δ0 met15Δ0 ura3Δ0 LYS1-GFP: HygMX                                                                                                      | This study    |            |
| BY4741: MATa his3Δ1 leu2Δ0 met15Δ0 ura3Δ0 MET6-GFP:HIS3                                                                                                        | <sup>77</sup> |            |
| BY4741: MATa his3Δ1 leu2Δ0 met15Δ0 ura3Δ0 SER1-GFP: HygMX                                                                                                      | This study    |            |
| BY4741: MATa his3Δ1 leu2Δ0 met15Δ0 ura3Δ0 SHM2-GFP: HygMX                                                                                                      | This study    |            |

|                                                                                                |                                             |  |
|------------------------------------------------------------------------------------------------|---------------------------------------------|--|
| BY4741: MATa his3Δ1 leu2Δ0 met15Δ0 ura3Δ0 THR1-GFP: HIS3                                       | <sup>77</sup>                               |  |
| BY4741: MATa his3Δ1 leu2Δ0 met15Δ0 ura3Δ0 THR4-GFP: HygMX                                      | This study                                  |  |
| BY4741: MATa his3Δ1 leu2Δ0 met15Δ0 ura3Δ0 TRP5-GFP: HygMX                                      | This study                                  |  |
| BY4741: MATα his3Δ1 leu2Δ0 met15Δ0 ura3Δ0 GLT1-GFP: HIS3 HSP104-mCherry: KanMX                 | This study                                  |  |
| BY4741: MATα his3Δ1 leu2Δ0 met15Δ0 ura3Δ0 GLT1-mKate2:HygMX                                    | This study                                  |  |
| BY4741: MATa his3Δ1 leu2Δ0 met15Δ0 ura3Δ0 GLT1H1537A,Y1538N,L1539S                             | This study                                  |  |
| BY4741: MATa his3Δ1 leu2Δ0 met15Δ0 ura3Δ0 GLT1H1537A,Y1538N,L1539S-GFP: HygMX                  | This study                                  |  |
| BY4741: MATa his3Δ1 leu2Δ0 met15Δ0 ura3Δ0 GLT1-GFP: HygMX                                      | This study                                  |  |
| BY4741: MATa his3Δ1 leu2Δ0 met15Δ0 ura3Δ0 GLT1V1498T,L1500S,L1503S-GFP: HygMX                  | This study                                  |  |
| BY4741: MATa his3Δ1 leu2Δ0 met15Δ0 ura3Δ0 GLT1F1511N,V1512T,L1515S,I1516N-GFP: HygMX           | This study                                  |  |
| BY4741: MATa his3Δ1 leu2Δ0 met15Δ0 ura3Δ0 GLT1V1553T,L1554S,L1555S-GFP: HygMX                  | This study                                  |  |
| BY4741: MATa his3Δ1 leu2Δ0 met15Δ0 ura3Δ0 Δgdh1:: KanMX                                        | EUROSCARF deletion collection <sup>78</sup> |  |
| BY4741: MATa his3Δ1 leu2Δ0 met15Δ0 ura3Δ0 Δgdh3:: KanMX                                        | EUROSCARF deletion collection <sup>78</sup> |  |
| BY4741: MATα his3Δ1 leu2Δ0 met15Δ0 ura3Δ0 Δgdh1:: KanMX Δgdh3:: KanMX                          | This study                                  |  |
| BY4741: MATα his3Δ1 leu2Δ0 met15Δ0 ura3Δ0 Δgdh1:: KanMX Δgdh3:: KanMX GLT1H1537A,Y1538N,L1539S | This study                                  |  |
| BY4741: MATα his3Δ1 leu2Δ0 met15Δ0 ura3Δ0 Δgdh1:: KanMX Δgdh3:: KanMX Δglt1::natNT2            | This study                                  |  |
| BY4741: MATa his3Δ1 leu2Δ0 met15Δ0 ura3Δ0 DIP5-GFP: HygMX                                      | This study                                  |  |
| BY4741: MATa his3Δ1 leu2Δ0 met15Δ0 ura3Δ0 GNP1-GFP: HygMX                                      | This study                                  |  |
| BY4741: MATa his3Δ1 leu2Δ0 met15Δ0 ura3Δ0 GAP1-GFP: HygMX                                      | This study                                  |  |
| BY4741: MATa his3Δ1 leu2Δ0 met15Δ0 ura3Δ0 GLT1H1537A,Y1538N,L1539S DIP5-GFP: HygMX             | This study                                  |  |



|                                                                                                                                                                                     |                                                                                                           |                        |
|-------------------------------------------------------------------------------------------------------------------------------------------------------------------------------------|-----------------------------------------------------------------------------------------------------------|------------------------|
| BY4741: MATa his3Δ1 leu2Δ0 met15Δ0 ura3Δ0<br>GLT1H1537A,Y1538N,L1539S GNP1-GFP:<br>HygMX                                                                                            | This study                                                                                                |                        |
| BY4741: MATa his3Δ1 leu2Δ0 met15Δ0 ura3Δ0<br>GLT1H1537A,Y1538N,L1539S GAP1-GFP:<br>HygMX                                                                                            | This study                                                                                                |                        |
| BY4741: MATa his3Δ1 leu2Δ0 met15Δ0 ura3Δ0,<br>chrI::TERMCYCI-preSU9-yeGFP- <sub>P<sub>MET17</sub></sub> ::P <sub>ADH1</sub> -<br>preCOX4-mCherry::URA3                              | This study                                                                                                |                        |
| BY4741: MATa his3Δ1 leu2Δ0 met15Δ0 ura3Δ0<br>GLT1H1537A,Y1538N,L1539S, chrI::TERMCYCI-<br>preSU9-yeGFP- <sub>P<sub>MET17</sub></sub> ::P <sub>ADH1</sub> -preCOX4-<br>mCherry::URA3 | This study                                                                                                |                        |
| MEP MATa ade2::hisG his3 leu2 met15D::ADE2<br>ura3D0 trp1D63 hoD::SCW11pr-Cre-EBD78-<br>NatMX loxP-UBC9-loxP-LEU2 loxP-CDC20-<br>Intron-loxP-HPHMX SSA1-GFP:HIS3                    | <sup>25</sup>                                                                                             |                        |
| <b>Recombinant DNA</b>                                                                                                                                                              |                                                                                                           |                        |
| Plasmid: pYM44 (yeGFP-HIS3MX6)                                                                                                                                                      | <sup>79</sup> Euroscarf                                                                                   | P30256                 |
| Plasmid: pYM25 (yeGFP - hphNT1)                                                                                                                                                     | <sup>79</sup> Euroscarf                                                                                   |                        |
| Plasmid: pYM25-mK2 (mKate2 - hphNT1)                                                                                                                                                | This study                                                                                                |                        |
| Plasmid: pYM25- GLT1- yeGFP - hphNT1                                                                                                                                                | This study                                                                                                |                        |
| Plasmid: pYM25- GLT1V1498T,L1500S,L1503S-<br>yeGFP - hphNT1                                                                                                                         | This study                                                                                                |                        |
| Plasmid: pYM25- GLT1F1511N,V1512T,L1515S,I1516N - yeGFP -<br>hphNT1                                                                                                                 | This study                                                                                                |                        |
| Plasmid: pYM25- GLT1H1537A,Y1538N,L1539S<br>- yeGFP - hphNT1                                                                                                                        | This study                                                                                                |                        |
| Plasmid: pYM25- GLT1V1553T,L1554S,L1555S -<br>yeGFP - hphNT1                                                                                                                        | This study                                                                                                |                        |
| Plasmid: GAN230-TetR-mKate2                                                                                                                                                         | <sup>80</sup>                                                                                             |                        |
| Plasmid: pML104 CAS9 – URA3                                                                                                                                                         | <sup>81</sup>                                                                                             |                        |
| Plasmid: pML104 gRNA_GLT1 4608_CAS9 –<br>URA3                                                                                                                                       | This study                                                                                                |                        |
| Plasmid: pMitoLoc TERMCYCI-preSU9-yeGFP-<br>P <sub>MET17</sub> - P <sub>ADH1</sub> -preCOX4-mCherry - natMX6                                                                        |                                                                                                           |                        |
| Plasmid: CfB2188                                                                                                                                                                    | Easy Clone 2.0<br>(Addgene)                                                                               | RRID:Addgene_39<br>296 |
| Plasmid: pFA6a-kanMX6                                                                                                                                                               | <sup>79</sup> Euroscarf                                                                                   | 39296                  |
| Plasmid: pFA6-natNT2                                                                                                                                                                | <sup>79</sup> Euroscarf                                                                                   | P30346                 |
| <b>Software and algorithms</b>                                                                                                                                                      |                                                                                                           |                        |
| gRNA design tool for CRISPR                                                                                                                                                         | <a href="http://wyrickbioinfo2.smb.wsu.edu/crispr.html">http://wyrickbioinfo2.smb.wsu.edu/crispr.html</a> |                        |

|                                                    |                                                                           |  |
|----------------------------------------------------|---------------------------------------------------------------------------|--|
| FIJI ImageJ: MitoLoc and Yeast correlation plug in | <sup>64</sup> <sup>64</sup>                                               |  |
| GraphPad Prism version 9                           | Dotmatics                                                                 |  |
| MetaboAnalyst version 5                            | <a href="https://www.metaboanalyst.ca/">https://www.metaboanalyst.ca/</a> |  |
| R v4.1.0                                           | Vigorous Calisthenics                                                     |  |
| FlowJo v10                                         | BD Biosciences                                                            |  |

550

## 551 **Experimental model and subject details**

### 552 Yeast strains and plasmids

553 All strains used in this study are derivatives of *Saccharomyces cerevisiae* S288c (BY4741)<sup>75</sup> and  
554 are listed in resource table. Endogenous gene tagging with GFP, mCherry or mKate2 were done  
555 by homologous recombination<sup>79</sup>. Briefly, primers annealing to the tagging cassette in the plasmid  
556 with additional 45 – 55 bp overhangs homologous to a place upstream and downstream of the  
557 STOP codon of desired gene were constructed. Tagging plasmid with mKate2 fluorophore YM25-  
558 mK2 was constructed by replacing GFP from YM25 plasmid<sup>79</sup> with mKate2 from GAN230-TetR-  
559 mKate2<sup>80</sup> plasmid by homologous recombination in *Escherichia coli* DH5 $\alpha$  cells<sup>82</sup>. For this,  
560 YM25 was linearized to exclude GFP by PCR and mKate2 was amplified from the plasmid  
561 GAN230-TetR-mKate2 with primers containing 25 bp overhangs complementary to linearized  
562 YM25. Purified fragments were assembled by mixing them vector:insert ratio of 1:3 and  
563 transforming them into *E. coli* DH5 $\alpha$  strain<sup>82</sup>. For genomic integration of MitoLoc, EasyClone  
564 2.0 (Addgene) was used. Functional elements of original pMitoLoc TERM<sub>CYC1</sub>-preSU9-yeGFP-  
565 P<sub>MET17</sub> - P<sub>ADH1</sub>-preCOX4-mCherry - natMX6<sup>64</sup> was amplified with P1\_f and G1\_r primers and  
566 inserted in pCfB2188 plasmid. For genomic integrations into chromosome X, plasmid was cut  
567 with NotI and transformed into yeast (see Yeast transformation).

568

569 For Glt1 mutagenesis, GLT1 gene was inserted into GFP tagging plasmid YM25. First YM25  
570 plasmid was linearized with PCR and assembled with GLT1 PCR fragment that contains 35 bp  
571 overhangs complementary to the plasmid by homologous recombination in *E. coli* DH5 $\alpha$  strain<sup>82</sup>.  
572 For this, purified PCR fragments were mixed with vector:insert ratio 1:3 and transformed to *E.*  
573 *coli* DH5 $\alpha$  strain. Then primers with certain mismatches in GLT1 gene were designed so that the  
574 round-the-clock amplified YM25-GLT1-GFP plasmid would contain desired mutations. Reaction  
575 mixtures were treated with restriction enzyme DpnI (Thermo Fischer Scientific) to disrupt  
576 template DNA and transformed into *E. coli* DH5 $\alpha$  strain. Newly generated plasmids were  
577 sequenced and inserted into yeast cells by homologous recombination with primers homologous  
578 to the sequence upstream and downstream of the gene (S1 and S2) to replace genomic GLT1 with  
579 GFP-tagged mutants (Janke *et al.*, 2004).

580

581 Endogenous non-polymerizing GLT1 mutant H1537A, Y1538N, L1539S without tags or selection  
582 markers were generated with CRISPR-Cas9 system in yeast<sup>81</sup> and were used in experiments Fig.  
583 4 and 5 and associated supplementary figures. Primers for gRNA were created with the online tool  
584 (<http://wyrickbioinfo2.smb.wsu.edu/crispr.html>) and the primer which was closest to the target  
585 sequence was selected at the position 4608 bp in the open reading frame. Vector for Glt1 mutation

586 by CRISPR-Cas9 was prepared by ligating annealed and phosphorylated gRNA oligonucleotides  
587 with Smi/BclI digested plasmid pML104<sup>81</sup>. After sequencing, newly generated plasmid together  
588 with annealed 100 bp repair template containing desired mutation were transformed into yeast.  
589 Correct mutagenesis was confirmed with sequencing and Cas9 expressing plasmid was eliminated  
590 by streaking correct clone on YPD plate and selecting for single colonies which were no longer  
591 able to grow in absence of uracil.

592

#### 593 Yeast cell culture, media and drug treatments

594 Cells were grown in exponential phase in YPD medium (1 % yeast extract, 2% Bacto peptone, 2%  
595 glucose) for 24 h before every experiment. Media were exchanged by washing cells twice with  
596 PBS and resuspending in the medium of interest. Media types refer to medium without amino acids  
597 (no AA) (6,7g/L YNB base, 2% glucose), minimal medium (MM) (0,02 g/L of Ura, Met, Leu, His,  
598 6.7 g/L YNB base, 2% glucose), Synthetic minimal medium (SD) (0,02 g/L L-Ade, L-Arg, L-His,  
599 L-Met, L-Trp, Ura, 0.03 g/L L-Ile, L-Lys, L-Tyr, 0.05 g/L L-Phe, 0.1 g/L L-Leu, 0.15 g/L L-Val,  
600 0.2 g/L L-Thr, 6.7g/L YNB base, 2% glucose), Synthetic complete medium (SC) (0.013 g/L L-  
601 Ade, 0.35 g/L L-Arg, L-inositol, 0.26 g/L L-Asp, L-Leu, 0.,057 g/L L-His, 0.52 g/L L-Ile, 0.09  
602 g/L L-Lys, 0.19 g/L L-Met, 0.082 g/L L-Phe, L-Trp, 0.01 g/L L-Ser, 0.12 g/L L-Thr, L-Val, 0.013  
603 g/L L-Ade, 0.018 g/L L-Tyr, 0.013 g/L L-Ade, 0.02 g/L Ura, 6.7 g/L YNB base, 2% glucose).  
604 Special additives were added to the final concentration of 2% Bacto peptone, 10 µM carbonyl  
605 cyanide 3-chlorophenylhydrazone (CCCP), 500 nM concanamycin A (ConcA).

606

#### 607 **Methods details**

##### 608 Transformation of yeast

609 Overnight yeast cell culture was diluted to OD<sub>600</sub> 0.1 in liquid YPD media and grown until it  
610 reached OD<sub>600</sub> 0.6. Then cells were pelleted by centrifuging them at 500 g for 5 min and washed  
611 twice with transformation buffer (100 mM LiOAc, 10 mM Tris, 1 mM EDTA, pH 8). Then cell  
612 pellet was resuspended in 72 µl transformation buffer and mixed with plasmid DNA (2 µl) or PCR  
613 product (10µl), 8 µl of 100 mg/ml salmon sperm DNA (prior to use boiled for 10min at 100 °C  
614 and cooled down on ice), 500 µl of PEG buffer (40% PEG-3350 (m/V), 100 mM LiOAc, 10 mM  
615 Tris, 1 mM EDTA, pH 8) and incubated in room temperature for 30 min. Then 65 µl of DMSO  
616 was added and yeast were subjected to heat shock at 42 °C for 15 min and spun down at 300 g for  
617 5 min. If no auxotrophic marker was used for selection, yeast pellets were resuspended into 100 µl  
618 of corresponding media and plated on agar plates with the same media. If antibiotics were used,  
619 samples were incubated in 3 ml of YPD media for 2 – 3 h and then plated on YPD plates with  
620 antibiotics.

621

##### 622 Purification of young and aged yeast cells by magnetic-activated cell sorting

623 For young cell (0-1 generations) purification, cells were grown in exponential phase in YPD media  
624 for 24 h before biotinylation. Then 2 x 10<sup>8</sup> cells were washed three times with PBS, resuspended  
625 in 3 mg/ml Sulfo-NHS-LC-Biotin (Thermo Fischer Scientific) solution in PBS and incubated on  
626 a rocking platform in room temperature for 30 min. Then cells were washed twice and resuspended  
627 in 200 ml of prewarmed YPD media. After 2.5 h of growth in 130 rpm at 30 °C, cells were  
628 harvested and resuspended into 2 x 10<sup>8</sup> cells/ml in PBS with 2 mM EDTA and 1:20 of the volume  
629 of Streptavidin MicroBeads (Miltenyi Biotec). Cells were incubated on a rocking platform for 30  
630 min in 4 °C and later resuspended into 12 ml of ice-cold PBS with 2 mM EDTA. Young cells were

631 collected by passing cell suspension through the MS column (Miltenyi Biotec) attached to a  
632 magnetic stand and collecting flow through supernatant.

633 For aged cell (4-6 generations) purification, the procedure is the same, except that after  
634 biotinylation cells are grown in 500 ml of prewarmed YPD media for 6 h. Then when cells are put  
635 into the column, the column is washed 4 times with LiP buffer (20 mM hepes, 150 mM KCl, 10  
636 mM MgCl<sub>2</sub>) for LiP-MS analysis and in PBS for metabolomics and RNA-seq analyses. Aged cells  
637 were eluted in LiP buffer or PBS by removing MS column from the magnetic stand.

638 After purification cells were resuspended into 1 ml of ice-cold LiP buffer or PBS and small amount  
639 of cell suspension was taken to access cell number with cell counter. The required number of cells  
640 was then divided into separate 1.5 ml tubes, spun down to remove supernatant and the pellet was  
641 snap frozen with liquid nitrogen for storage or directly used for downstream applications. In  
642 addition, a few microliters of initial purified cell culture were stained with calcofluor 10 µg/ml  
643 (from 1 mg/ml stock in DMSO) and fixed by adding two volumes of cell suspension of 4% PFA  
644 incubating cells for 15 min. In addition to calcofluor, streptavidin conjugated to Alexa Fluor™  
645 633 was added to the fixation samples for only aged cells for assessing the purity of purification  
646 by tracking initially biotinylated cells. After fixation, cells were centrifuged and the pellet was  
647 resuspended into 4 µl Mowiol-DABCO mounting media and put on a glass slide with thin glass  
648 cover slip. Cell age was assessed with microscopy (see Microscopy and live imaging) by  
649 calculating bud scars in calcofluor stained cell wall for at least 100 cells for each sample.

650

#### 651 Native protein extraction for LiP-MS

652 Cells were pelleted at 3000 g for 5 minutes at 4 °C and washed twice with ice-cold LiP-buffer (20  
653 mM Hepes, 150 mM KCl, 10 mM MgCl<sub>2</sub>, pH 7.5), and subsequently resuspended in 1 mL LiP-  
654 buffer. Resuspended mixtures were snap-frozen in droplets by pipetting into liquid nitrogen. Lysis  
655 of the snap-frozen cell suspension droplets was performed using a 6775 Freezer/Mill Instrument  
656 (Thomas Scientific, Swedesboro, NJ, USA) according to the manufacturer's instructions. Protein  
657 concentration of the resulted cell lysates (without clearing by centrifugation) were determined with  
658 bicinchoninic acid assay (BCA Protein Assay Kit, Thermo Scientific, Rockford, IL).

659 Limited proteolysis (LiP) was performed as previously described<sup>41</sup>. Briefly, 100 µg of lysate was  
660 subjected to Proteinase K (Sigma Aldrich) treatment at an enzyme to substrate ratio (E:S) of 1:100  
661 at RT. The LiP reaction was stopped by boiling in a water bath at > 95 °C. Complete protein  
662 denaturation was achieved by adding sodium deoxycholate (DOC) (Sigma Aldrich) to a final  
663 concentration of 5% (w/v). Disulfide bridges were reduced by adding tris(2-  
664 carboxyethyl)phosphine TCEP to a final concentration of 5 mM and incubation at 37 °C for 30  
665 minutes. Reduced cysteine residues were alkylated by adding iodoacetamide IAA to a final  
666 concentration of 40 mM and incubation of 45 minutes at RT in the dark. Tryptic peptides were  
667 obtained by a first digestion with LysC (Wako Pure Chemical Industries) at an E:S of 1:100 for 4  
668 h at 37 °C, followed by a second digestion with Trypsin (Promega) at an E:S of 1:100 overnight  
669 at 37 °C. For the digestion steps, DOC concentration and pH were adjusted to the optimal values  
670 as previously reported<sup>41</sup>. Digestion was stopped by adjusting the pH to < 3 and precipitated DOC  
671 was removed by centrifugation. Finally, resulted peptides were desalted using Sep-Pak column  
672 (Waters) according to manufacturer's instructions.

673 Peptides were separated using an online EASY-nLC 1000 HPLC system (Thermo Fisher  
674 Scientific) operated with a 15 cm long in house packed reversed-phase analytical column (Reprosil  
675 Pur C18 Aq, Dr. Maisch, 1.9 mm) before being measured on a Q-Exactive Plus (QE+) mass  
676 spectrometer. A linear gradient from 5%–25% acetonitrile in 140 min at a flowrate of 300 nl/min  
677 was used to elute the peptides from the column. Precursor ion scans were measured at a resolution  
678 of 70,000 at 200 m/z and 20 MS/MS spectra were acquired after higher-energy collision induced



679 dissociation (HCD) in the Orbitrap at a resolution of 17,500 at 200 m/z per scan. The ion count  
680 threshold was set at 1,00 to trigger MS/MS, with a dynamic exclusion of 25 s. Raw data were  
681 searched against the *S. cerevisiae* Uniprot database using SEQUEST embedded in the Proteome  
682 Discoverer software (both Thermo Fisher Scientific). Digestion enzyme was set to trypsin,  
683 allowing up to two missed cleavages, one non-tryptic terminus and no cleavages at KP (lysine-  
684 proline) and RP (arginine-proline) sites. Precursor and fragment mass tolerance was set at 10 ppm  
685 and 0.02 Da, respectively. Carbamidomethylation of cysteines (+57.021 Da) was set as static  
686 modification whereas oxidation (+15.995 Da) of methionine was set as dynamic modification.  
687 False discovery rate (FDR) was estimated by the Percolator (embedded in Proteome Discoverer)  
688 and the filtering threshold was set to 1%. Label-free quantitation was performed using the  
689 Progenesis-QI Software (Nonlinear Dynamics, Waters). Raw data files were imported directly into  
690 Progenesis for analysis. MS1 feature identification was achieved by importing the filtered search  
691 results (as described above) from Proteome Discoverer into Progenesis to map the corresponding  
692 peptides based on their m/z and retention times. Annotated peptides were then quantified using the  
693 areas under their extracted ion chromatograms.

694

### 695 3D structural analyses

696 LiP conformotypic peptides were mapped to available protein structures to analyze the overlap of  
697 these structural alterations and functionally relevant sites within the protein (e.g., substrate binding  
698 sites). The EMBOSS Needle tool (EMBL-EBI) was used for pairwise sequence alignment of yeast  
699 protein sequences with homologous proteins. Structural analyses and visualization were performed  
700 with UCSF ChimeraX-1.1. <sup>83,84</sup> *Escherichia coli* DnaK protein structures were used to visualize  
701 conformotypic peptides of the yeast Hsp70 proteins (Ssa1, Ssb1, Ssb2 and Kar2) in open  
702 conformation (Protein Data Bank (PDB) ID: PDB:4B9Q) <sup>85</sup>, closed conformation (PDB:2KHO) <sup>74</sup>  
703 and the substrate binding domain (SBD) in complex with a substrate peptide (PDB:1DKX) <sup>49</sup>. The  
704 yeast Trm1 conformotypic peptide was mapped to a *Pyrococcus horikoshii* Trm1-S-adenosyl-L-  
705 Methionine complex structure (PDB:2EJT) <sup>52</sup>.

706 A model of the Glt1 structure was created by SWISS-MODEL homology modeling server <sup>86</sup> using  
707 a homologous structure, glutamate synthases from *Azospirillum Brasilense* (PDB: 2VDC), as a  
708 template <sup>57</sup>. Two types of Glt1 oligomers, with either C3 or D3 symmetry, were created by aligning  
709 the homology model with the symmetry-related chains in the D3 symmetric complex of the  
710 template structure using the Matchmaker tool in UCSF ChimeraX <sup>84</sup>. Figures of the oligomers  
711 highlighting the peptides identified by LiP / MS and mutated residues were created in the same  
712 software.

713

### 714 Contact site analysis

715 Chord plots illustrating contact sites between LiP peptide region in age-altered proteins and their  
716 clients were created using information on non-covalent contacts from the Protein Contact Atlas or  
717 custom data and processed with a python script to create a matrix of contacts between a protein  
718 and a client peptide. If suitable data was not available in Protein Contact Atlas, the non-covalent  
719 bonds were calculated with the coordinates provided in the PDB structure. Chord plots illustrations  
720 on client peptide bound to Hsp70s were based on *E. coli* DnaK (PDB:1DKX) <sup>49</sup> and chord plots on  
721 Trm1 bound to S-adenosyl-L-Methionine was based on Trm1 from *P. horikoshii* (PDB:2EJT) <sup>52</sup>.  
722 Distances between pairs of atoms were defined with Euclidean distance. The radii of the atoms in  
723 contact were reduced from the distance. The radii of protein atoms were defined as previously  
724 described <sup>87</sup> and for client peptide atoms, Van der Waals radii were used. The threshold for non-  
725 covalent contact was set to 4 Å <sup>50</sup>. The matrixes were imported to R 4.1.0 and plots were created  
726 with circlize package v0.4.15 chordDiagram function.

727

728

### Microscopy and microfluidics

729

730

731

732

733

734

735

736

737

738

739

740

741

742

743

744

745

746

747

748

### Correlative light and electron microscopy (CLEM)

749

750

751

752

753

754

755

756

757

758

759

760

761

762

763

764

765

766

767

768

769

770

771

Yeast expressing Glt1-GFP were grown overnight in exponential phase in SD liquid media before the fixation. Then, 200 mL of the culture containing around  $2.5 \times 10^6$  cells was added to a 1 mg/mL Poly-L-Lysine (Sigma Aldrich) pre-coated MatTek dish with a gridded cover slip. The culture was incubated for 10 min at room temperature to allow cell sedimentation before removing the SD media and adding 200 mL of a fixative solution (3 % PFA, 0.5 % glutaraldehyde, 0.2 M citrate-phosphate buffer, pH 5.5). After 1 h incubation, samples were washed three times with 0.2 M citrate-phosphate buffer (pH 5.5) by keeping the washing solution on the sample dish for 5 min and 2 ml of the same buffer was added to fixed cells. Then cells were imaged with widefield fluorescent microscope DeltaVision Ultra (GE Healthcare) using brightfield channel and 60x oil objective (see Microscopy and live imaging) and cells of interest were located on the MatTek grid. Next, samples were fixed for electron microscopy by incubating the cells in fixative solution (2% glutaraldehyde, 3% PFA, 0.2 M citrate-phosphate buffer, pH 5.5) for 30 min at room temperature. After washing with 0.2 M citrate-phosphate buffer and distilled water, the cells were post-fixed with 2% potassium permanganate for 1 h, on ice. Prior gradual infiltration into low viscosity epoxy (TAAB, Aldermaston, UK) the samples were subjected to dehydration by increasing concentrations of ethanol. After incubating 2 x 3 h with 100% epoxy, the block was polymerized at 60°C for 16 h. The block was removed from the cover slip and a pyramid was trimmed according to the finder grid pattern transferred to the block surface. Serial 60-nm-thick sections were cut with an ultramicrotome (Leica EM Ultracut UC6i or UC7, Leica Mikrosysteme GmbH, Austria) and collected on Pioloform coated, single slot grids. The sections were post-stained with uranyl acetate and lead citrate and examined using a Hitachi HT7800 transmission electron microscope (Hitachi High-Technologies, Tokyo, Japan) operated at 100 kV, and a Rio9 CMOS-camera (Gatan Inc., AMETEK, Pleasanton, CA).

772

773 tRNA isolation and m<sup>2,2</sup>G quantification by UPLC/MS

774 TRNA was isolated from young and aged cells (see Purification of young and aged yeast cells by  
775 magnetic-activated cell sorting) as previously described<sup>88</sup> with the following modifications.  
776 Briefly, approx. 10<sup>8</sup> of young or aged cells were resuspended in 250 µL of 0.9% NaCl and lysed  
777 in an equal volume of acidic phenol (pH 4.3) with 1/5 volume of 1-bromo-3-chloropropane (BCP)  
778 and glass beads. Cells were sheared by vortexing for 5 min at full speed, followed by centrifugation  
779 for 15 min at 10 000 g, 22 °C. The aqueous phase was then transferred to a new centrifugation  
780 tube and re-extracted with acidic phenol/BCP. The re-extracted aqueous phase was collected and  
781 the volume was adjusted to 10 ml with equilibration buffer EQ (10 mM Tris-HCl pH 6.3, 15%  
782 ethanol, 200 mM KCl), after which it was applied onto a pre-equilibrated (EQ buffer containing  
783 0.15% Triton X-100) Nucleobond AX-100 column (Macherey-Nagel). The column was washed  
784 twice with wash buffer WB (10 mM Tris-HCl pH 6.3, 15% ethanol, 300 mM KCl). TRNA was  
785 eluted with 10 mL of elution buffer EB (10 mM Tris-HCl pH 6.3, 15% ethanol, 750 mM KCl) into  
786 2.5 vol. of 99.6% ethanol. The tRNA was precipitated O/N at -20 °C and pelleted by centrifugation  
787 for 30 min at 10 000 g, 4 °C. Residual salt was removed by washing the pellet with 80% ethanol.  
788 Then, tRNA pellet was air-dried at RT and re-suspended in RNase/DNase-free water.  
789 Dephosphorylated monoribonucleosides for MS analysis were generated as previously described<sup>89</sup>.  
790 For data normalization, cleaved monoribonucleosides were spiked with <sup>15</sup>N-labeled  
791 ribonucleosides, which served as an internal standard (25 ng <sup>15</sup>N-labelled ribonucleosides per 100  
792 ng of sample). Samples were analyzed as described in<sup>90</sup> using a Waters Acquity® UPLC system  
793 attached to a Waters Synapt G2 HDMS mass spectrometer via an ESI ion source.

794

795 Metabolite profiling

796 Before extraction young and old yeast cells were purified with magnetic sorter (see Purification of  
797 young and aged yeast cells by magnetic-activated cell sorting). 2.5 x 10<sup>7</sup> cells were taken for steady  
798 state metabolomics. For flux analysis 2.5 x 10<sup>7</sup> cells were treated in SC media with labeled 6.5  
799 mM <sup>13</sup>C<sub>5</sub><sup>15</sup>N<sub>2</sub>-Gln (CNLM-1275-PK) for 30 min pulse. The yeast suspension was washed twice  
800 with 1xPBS, and metabolites were extracted with 500µl ice-cold buffer acetonitrile:ddH<sub>2</sub>O  
801 (80:20). Subsequently, the samples were sonicated 2 min and vortexed for 30 s for 3 rounds in  
802 total, centrifuged 16 000 g, 10 min at +4°C and the supernatant was taken to further analysis.  
803 All samples were analyzed on Thermo Q Exactive Focus Quadrupole Orbitrap mass spectrometer  
804 coupled with a Thermo Dionex UltiMate 3000 HPLC system (Thermo Fisher Scientific, Inc.). The  
805 HPLC was equipped with a hydrophilic ZIC-pHILIC column (150 × 2.1 mm, 5 µm) with a ZIC-  
806 pHILIC guard column (20 × 2.1 mm, 5 µm, Merck Sequant). 5 µl of the samples were injected  
807 into the LC-MS after quality controls in randomized order having every 10<sup>th</sup> sample as blank. The  
808 separation was achieved by applying a linear solvent gradient in decreasing organic solvent (80–  
809 35%, 16 min) at 0.15 ml/min flow rate and 45°C column oven temperature. The mobile phases  
810 were following, aqueous 200 mmol/l ammonium bicarbonate solution (pH 9.3, adjusted with 25%  
811 ammonium hydroxide), 100% acetonitrile and 100% water. The amount of the ammonium  
812 bicarbonate solution was kept at 10% throughout the run resulting in steady 20 mmol/l  
813 concentration. Metabolites were analyzed using a MS equipped with a heated electrospray  
814 ionization (H-ESI) source using polarity switching and following setting: resolution of 70,000 at  
815 m/z of 200, the spray voltages: 3400 V for positive and 3000 V for negative mode, the sheath gas:  
816 28 arbitrary units (AU), and the auxiliary gas: 8AU, the temperature of the vaporizer: 280°C,  
817 temperature of the ion transfer tube: 300 °C. Instrument control was conducted with the Xcalibur  
818 4.1.31.9 software (Thermo Scientific). The peaks for metabolites were confirmed using  
819 commercial standards (Merck Cambridge Isotope Laboratories & Santa Cruz Biotechnology). The

820 final peak integration was done with the TraceFinder 4.1 SP2 software (Thermo Scientific) and  
821 for further data analysis, the peak area data was exported as excel file.

822

### 823 Transcriptomic profiling

824 After young and aged cell purification (see Purification of young and aged yeast cells by magnetic-  
825 activated cell sorting), pellets containing  $2.5 \times 10^7$  cells were resuspended with 800  $\mu$ l of TRI  
826 reagent (Zymo research) and placed in 2 ml Touch Micro-Organism Lysing Mix tubes (Omni). In  
827 total, 4 replicates for each group were used. Then, cells were mechanically disrupted with Precellys  
828 24 Tissue Homogenizer (Bertin Instruments) at 6000 rpm for 15s for a total of 4 cycles with 2 min  
829 break on ice between cycles. RNA was further extracted using Direct-zol RNA Miniprep Kit  
830 (Zymo Research) following manufacturer's instructions. RNA concentration and purity was  
831 measured by NanoDrop, and RNA samples were stored at  $-80^\circ\text{C}$  before use.

832 RNA-seq library preparation and sequencing were performed by the Sequencing Unit of Institute  
833 of Molecular Medicine Finland FIMM Technology Centre at the University of Helsinki. Illumina  
834 TruSeq Stranded mRNA library preparation Kit (Illumina) and NextSeq 500 Mid Output Kit PE75  
835 (120 M reads) (Illumina) were used following manufacturer's instructions.

836

### 837 Protein extraction and Western Blot

838 Cells were harvested by centrifugation and the pellet containing  $6 - 8 \times 10^7$  cells was resuspended  
839 in 250  $\mu$ l Lysis Solution (0,25 M NaOH, 1%  $\beta$ -mercaptoethanol (v/v)) and 160  $\mu$ l of 50%  
840 Trichloroacetic acid. After 10 min incubation on ice, cells were centrifuged at high speed (21 500  
841 g) for 3 min and the pellet was subjected to 1 ml acetone. Samples were centrifuged again and the  
842 pellet was resuspended into sample buffer (120 mM Tris-HCl pH 6.8, 2% SDS) and heated in  $95^\circ\text{C}$   
843 for 5 min. Small amount of samples was used for quantification of protein concentration with  
844 BCA Protein assay Kit (Thermo Fisher Scientific) and 6x loading buffer (48% glycerol and 0,03%  
845 bromphenolblue) was added to the rest of the sample. For each sample 10 – 15  $\mu$ g of protein was  
846 loaded on a SDS-PAGE gel. For Glt1 detection via Western blot primary mouse Anti-GFP (Sigma-  
847 Aldrich) or mouse Anti-6x-His Tag (HIS.H8) (Thermo Fisher Scientific) antibodies were used. As  
848 a loading control primary rabbit Anti-PGK1 or mouse Anti- $\beta$ -actin [8F10-G10] antibodies were  
849 used. For detection horseradish peroxidase (HRP) conjugated Rabbit Anti-Mouse (Invitrogen) or  
850 Goat anti-Rabbit (Invitrogen) secondary antibodies were used.

851

### 852 Flow cytometry

853 Cells were grown in exponential phase for 24 h before biotinylation to distinguish aged cell  
854 fraction. For that, cells were washed three times with PBS and resuspended in 2 mg/ml Sulfo-  
855 NHS-LC-Biotin (Thermo Fischer Scientific) solution in PBS and incubated on a rocking platform  
856 in room temperature for 30 min. Then cells were washed twice and resuspended in colorless SD  
857 media at the density of  $5 \times 10^4$  cells/ml. Cells were grown in  $30^\circ\text{C}$  for 10 h to facilitate aging of  
858 biotinylated cells. Then, approx.  $2 \times 10^6$  cells were taken and stained with Steptavidin-Alexa  
859 Fluor™ 633 at the final concentration of 20  $\mu$ g/ml for 5 min. Cells were washed with PBS and  
860 resuspended in 1 ml of colorless SD media in a Falcon flowcytometry tube.

861 For vacuolar pH measurements, cells were incubated with 50  $\mu$ M of 2',7'-Bis(2-carboxyethyl)-  
862 5(6)-carboxyfluorescein acetoxymethyl ester (BCECF/AM) for 30 min at  $30^\circ\text{C}$  just before  
863 staining with Steptavidin-Alexa Fluor™ 633. Calibration curve was made by resuspending  
864 BCECF/AM stained cells in calibration buffer (50 mM MES, 50 mM HEPES, 50 mM KCl, 50  
865 mM NaCl, 0.2 M ammonium acetate, 10 mM sodium azide, 110  $\mu$ M monensin and 15  $\mu$ M  
866 nigericin) of different pH (5.5, 6.0, 6.5, 7.0, 7.5).



867 Cells were analyzed with BD LSRFortessa Flow Cytometer at the Flow Cytometry Unit in the  
868 University of Helsinki. GFP fluorophore was excited with 488 nm laser and optical filter 530/30  
869 (515-545 nm), BCECF/AM was excited with 405 nm laser optical filter 525/50 (500-550 nm) and  
870 488 nm 530/30 (515-545 nm) and for Alexa Fluor™ 633 fluorophore 640 nm laser and 670/30  
871 (655-685 nm) optical filter were used. Samples were collected by gating aged Steptavidin-Alexa  
872 Fluor™ 633 positive cells and collecting 10 000 events per sample.  
873 Flow cytometry data analysis was performed with FlowJo v10 software. Vacuolar pH of  
874 BCECF/AM stained cells was determined from signal in 488 nm /405 nm ratio and interpolated  
875 from the calibration curve using GraphPad v9 software.

876

#### 877 Replicative life span assay

878 Single cells of wt and non-polymerizing Glt1 mutant (H1537A, Y1538N, L1539S) were placed on  
879 YPD plate. After the first division, the daughters were selected for the aging experiment and the  
880 mother cells were discarded. These selected cells were then followed through their replicative  
881 lifespan by removing newly divided daughter cells. Cell replicative life span was followed for 12  
882 h in 30 °C following by incubation in + 4 °C overnight. Finite number of divisions for each cell  
883 were then plotted to generate the survival curves. The experiment was conducted with 3 biological  
884 replicates,  $N_{\text{mutant}} = 62$ ,  $N_{\text{wt}} = 40$ .

885

#### 886 Oxygen consumption assay

887 After young and aged cell purification (see Purification of young and aged yeast cells by magnetic-  
888 activated cell sorting) equal amount of  $1.4 \times 10^7$  cells were placed in 2 ml of SD media (see Yeast  
889 cell culture and media) and incubated with shaking at 30 °C for 30 min. Then 1 ml of cell culture  
890 was placed in Oxygraph+ system (Hansatech Instruments) and oxygen consumption was measured  
891 for 4 min from each strain. As a control 10 μM of mitochondrial respiration inhibitor carbonyl  
892 cyanide 3-chlorophenylhydrazone CCCP was added at the end of the measurement to account for  
893 false positive signal. In total two biological replicates were used for each strain.

894

### 895 **Quantification and statistical analyses**

#### 896 *LiP-MS*

897 Pairwise comparisons were performed between two conditions (young and aged), for PK-treated  
898 and control (non-PK) samples respectively. Peptide (PK samples) and protein (control samples)  
899 fold changes were calculated using three biological replicates per condition where the statistical  
900 significance was assessed with a two-tailed heteroscedastic Student's t test. A fold change was  
901 considered significant with a q-value (FDR-corrected p-value)  $< 0.05$  for peptides and proteins<sup>91</sup>.  
902 To correct for protein abundance changes, a normalization factor based on q-value filtered protein  
903 fold change for each protein was applied on corresponding peptide intensities. After correction,  
904 prefiltered peptides with an absolute abundance change  $> 5$  were selected as  
905 candidates. Functional enrichment by overexpression analysis of significant LiP hits were done  
906 with clusterProfiler v4.0.0 in R 4.1.0.

907

#### 908 *Analysis of characteristics enriched among age-altered proteins*

909 Most parameters for characterization of age-altered proteins were extracted from previously  
910 collected datasets described in<sup>92</sup>. Specifically, information about protein-protein interactions were  
911 obtained from BioGRID database<sup>93</sup>, number of GO functions retrieved through GO Slim  
912 annotations<sup>92</sup>, protein complex network using physical interactome map of yeast<sup>94</sup>, mutation rate  
913 from whole genome sequencing<sup>95</sup>, protein abundance were obtained from cells grown in log-phase  
914 and rich media from GFP signal of endogenously GFP-tagged proteins<sup>96</sup> and translation rate as a

915 function of ribosome density and occupancy<sup>97</sup>. The lists of anti-longevity genes of *C. elegans* and  
916 *S. cerevisiae* were obtained from GenAge database<sup>98</sup> and the yeast list was supplemented with  
917 genes identified in<sup>99</sup>. Statistical significance for these comparisons was assessed by unpaired t-test  
918 with Welch correction with False Discovery Rate (FDR) for multiple discoveries. Effect size is  
919 displayed as common language effect size (CLES). Information about protein solubility were  
920 obtained from SILAC based MS measurements<sup>100</sup>, aggregation during heat stress<sup>44</sup>, stress granule  
921 formation from affinity purification<sup>101</sup>, asymmetrically retained long-lived proteins and their  
922 fragments (LARPs) from stable-isotope pulse-chase and total proteome MS<sup>45</sup>, essential genes from  
923 growth of deletion strains in rich medium<sup>102</sup> and proteins with PEST motifs were predicted using  
924 EMBOSS 6.5.7<sup>92</sup>. Age-altered and background proteins were categorized with these  
925 characteristics by constructing contingency tables. The sample size n for individual comparisons  
926 between age altered proteins (N = 468) and background proteins (N = 2365) varies depending on  
927 data availability. Statistical significance for contingency tables was assessed with Fisher's exact  
928 test and effect size is displayed as odds ratio (OR). Outliers were determined with Robust  
929 regression and outlier removal (ROUT) test (Q = 1%).

930

### 931 *Microscopy image analyses*

932 Imaging data was analyzed with FIJI ImageJ software. MitoLoc analysis was performed using  
933 Yeast correlation plugin<sup>64</sup>. Statistical significance in various images was calculated using  
934 GraphPad software. Two tailed unpaired t-test was used to assess statistical significance between  
935 two different groups. Ordinary one-way ANOVA with Dunnett's correction for multiple  
936 comparisons was used to assess statistical significance for number of Glt1 polymers in different  
937 conditions. Two-way or three-way ANOVA with Šidák's correction for multiple comparisons was  
938 used to assess statistical significance of mitochondrial function in young and aged WT and *GLT1-*  
939 *MUT* in different conditions. Correlation coefficient (R) and its significance for mitochondrial  
940 function dependence on age was computed with standard Pearson's correlation test.

941

### 942 *Metabolomics*

943 Peak intensity values were analyzed with Metaboanalyst software. Data was log2 transformed and  
944 Pareto scaled for principal component (PCA) and orthogonal partial least square (OPLS) analyses.  
945 Statistical comparison of metabolite peak intensities between WT and *GLT1-MUT* was done with  
946 one-way ANOVA with Dunnett's correction for multiple comparisons using GraphPad v9  
947 software.

948

### 949 *RNA-seq data analysis*

950 Quality control of raw reads were performed with FastQC v0.11.9, followed by read filtering with  
951 Trim Galore v0.6.6 and rRNA removal with SortMeRNA v4.2.0. Transcriptome mapping was  
952 done with Salmon v1.4.0 and quality control of read mapping was done with STAR v2.7.8a and  
953 Qualimap v2.2.2d. Summary of quality control results was reported with MultiQC v1.9.  
954 Differentially expressed genes between young and aged cells as well as between WT and *GLT1-*  
955 *MUT* cells were found using DESeq2 v1.32.0 (adjusted p-value < 0.05, Wald test) in R 4.1.0.  
956 Functional enrichment of differentially expressed genes by overrepresentation analysis was done  
957 with clusterProfiler v4.0.0. For this study, the yeast genome/transcriptome references and gene  
958 annotations from Ensembl release 103 were used, which are based on yeast S288C genome  
959 assembly R64-1-1.

960

961

962

963 **Data availability**

964  
965 The LiP-MS proteomics, transcriptomics and metabolomics data generated and analyzed in the  
966 this study are available in the Harvard Dataverse repository  
967 (<https://dataverse.harvard.edu/privateurl.xhtml?token=d4325d32-19dc-473a-952a-359b2ad668cb>). All other data are included within the Article and its Extended Data.

969  
970 **Code availability**

971  
972 None of previously unreported custom code was generated in this study. Code used for processing  
973 of RNA sequencing data can be found in Harvard Dataverse depository  
974 (<https://dataverse.harvard.edu/privateurl.xhtml?token=d4325d32-19dc-473a-952a-359b2ad668cb>).

975  
976  
977  
978 **Acknowledgments:** We thank the members of the Saarikangas lab and Jette Lengefeld for input  
979 and Cory Dunn, Markus Ralser, Ahmad Khalil and Daniel Gottschling for reagents. We are  
980 grateful to the assisting personnel at the Light Microscopy (LMU), Electron Microscopy (EMBI)  
981 and Viikki Flow Cytometry FIMM Genomics and DNA sequencing and Genomics (BIDGEN)  
982 units and MIBS and BI Media Kitchens at the University of Helsinki. Graphics in Fig. 1A and Fig.  
983 4B, Fig. S9B were made in ©BioRender - biorender.com. This work was supported by the  
984 University of Helsinki, the Academy of Finland (317038), Sigrid Jusélius Foundation, the Human  
985 Frontiers Science Program Young Investigator Grant (RGY0080/2020) and Doctoral Programme  
986 in Integrative Life Science.

987  
988 **Author contributions:** Conceptualization: JuS, YB, PP, JP. Methodology: JP, RMLC, YF, KT,  
989 DS, EE, PG, MD, MS, JeS, AL, JJ, HV, AN. Investigation: JP, RMLC, YF, KT, DS, EE, PG, MD,  
990 MS, AL, JH, JuS. Funding acquisition: JuS. Supervision: PT, LH, EJ, AK, PLS, VH, PP, YB, JuS.  
991 Writing - original draft: JP, JS with feedback from all the authors.

992  
993 **Declaration of interests:** P.P. is a scientific advisor for the company Biognosys AG (Zurich,  
994 Switzerland) and PP and YF are inventors of a patent licensed by Biognosys AG that covers the  
995 LiP-MS method used in this manuscript.

996  
997 **Supplemental information:**

998 Supplemental figures S1 to S9

999 Movie S1

1000

1001

1002  
1003  
1004  
1005  
1006  
1007  
1008  
1009  
1010  
1011  
1012  
1013  
1014  
1015  
1016  
1017  
1018  
1019  
1020  
1021  
1022  
1023  
1024  
1025  
1026

**Supplemental information for**  
**Global mapping of protein structural changes**  
**identifies new determinants of aging**

Jurgita Paukštytė<sup>1,2</sup>, Rosa María López Cabezas<sup>1,2</sup>, Yuehan Feng<sup>3</sup>, Kai Tong<sup>1,2,4,5</sup>, Daniela Schnyder<sup>3</sup>, Ellinoora Elomaa<sup>1,2</sup>, Pavlina Gregorova<sup>2</sup>, Matteo Doudin<sup>1,2</sup>, Meeri Särkkä<sup>1,2</sup>, Jesse Sarameri<sup>1,2</sup>, Alice Lippi<sup>6</sup>, Helena Vihinen<sup>7</sup>, Juhana Juutila<sup>2,7</sup>, Anni Nieminen<sup>2,7</sup>, Petri Törönen<sup>2,7</sup>, Liisa Holm<sup>2,7</sup>, Eija Jokitalo<sup>7</sup>, Anita Krisko<sup>6</sup>, Juha Huiskonen<sup>7</sup>, L. Peter Sarin<sup>2</sup>, Ville Hietakangas<sup>2,7</sup>, Paola Picotti<sup>3,8</sup>, Yves Barral<sup>3</sup>, Juha Saarikangas<sup>1,2,7,9,\*</sup>

Correspondence to: [juha.saarikangas@helsinki.fi](mailto:juha.saarikangas@helsinki.fi)

Supplemental Figs. S1 to S9  
Captions for Movie S1

**Other Supplemental Materials for this manuscript include the following:**

Movie S1

1027  
1028  
1029  
1030  
1031  
1032  
1033  
1034  
1035  
1036  
1037  
1038  
1039  
1040  
1041  
1042  
1043  
1044  
1045  
1046  
1047  
1048  
1049  
1050  
1051  
1052  
1053  
1054  
1055  
1056  
1057  
1058  
1059  
1060  
1061  
1062  
1063  
1064  
1065  
1066  
1067  
1068  
1069  
1070  
1071  
1072  
1073  
1074

## Supplemental figure legends

### Figure S1. Age-related structural changes are prevalent in abundant and pleiotropic regulators of metabolism.

A. Overview of the online ProtAge database containing all age-altered proteins found at <https://protage-server-21.it.helsinki.fi/>.

B. Number of link communities in protein-protein interaction (PPI) network between age-altered proteins ( $n = 460$ ) (light blue) and unaltered proteins ( $n = 2279$ ) (grey).

C. Fraction of essential genes among age-altered proteins ( $n = 468$ ) (light blue) compared to unaltered proteins ( $n = 2332$ ) (grey).

D. Mutation rates expressed as density of amino acid substitutions between age-altered protein coding genes ( $n = 417$ ) (light blue) and unaltered ( $n = 2198$ ) (grey).

E. Distribution of protein solubility between age-altered proteins ( $n = 383$ ) (light blue) and unaltered proteins ( $n = 922$ ) (grey).

F. Comparison of protein abundance expressed as copy numbers per cell between age-altered proteins (light blue) ( $n = 361$ ) and unaltered proteins ( $n = 1572$ ) (grey).

G. Relative translation rate of age-altered proteins ( $n = 444$ ) (light blue) and unaltered proteins ( $n = 2162$ ) (grey).

H. Fraction of proteins with protein degradation PEST motif between age-altered proteins ( $n = 468$ ) (light blue) and unaltered proteins ( $n = 2332$ ) (grey). Black line in box plots in (B, D, F, G) is median and whiskers mark 10 and 90 percentile values. Effect size is displayed as common language effect size (CLES) (B, D, F, G), and as odds ratio (OR) (C, E, H). \* $P < 0.05$ ; \*\*\*\* $P < 0.0001$ .

### Figure S2. Mapping aging-associated structural changes in the substrate-binding domain of Hsp70 chaperones.

A. Interconnected network among age-altered regulators of protein folding GO category. The graph depicts high confidence protein-protein interactions (STRING, confidence score  $> 0.7$ ).

B. Cartoon representation of ATP-bound 'closed' Hsp70. The close-up displays the Lip-peptides in Ssa1 (red) located in the nucleotide binding domain (NBD) (gray) (PDB:4B9Q; <sup>74</sup>).

C. Ssb1 LiP-peptides (red) that localize in the substrate binding domain (SBD) of client peptide (yellow)-bound Hsp70 (PDB:1DKX) <sup>49</sup>.

D. Chordplot illustration based on (PDB:1DKX) <sup>49</sup> of contacts between Ssb1 LiP-peptides (red) and client peptide (yellow). Contacting secondary structures are illustrated by inner arcs.

E. Ssb2 LiP-peptides (red) localizing in the substrate binding domain (SBD) of client peptide (yellow)-bound Hsp70 (PDB:1DKX) <sup>49</sup>.

F. Chordplot illustration based on (PDB:1DKX) <sup>49</sup> of contacts between Ssb2 LiP-peptides (red) and client peptide (yellow). Contacting secondary structures are illustrated by inner arcs.

G. Kar2 LiP-peptides (red) localizing to substrate binding domain (SBD) of client peptide (yellow)-bound Hsp70 (PDB:1DKX) <sup>49</sup>.

H. Chordplot illustration based on (PDB:1DKX) <sup>49</sup> of contacts between Kar2 LiP-peptides (red) and client peptide (yellow). Contacting secondary structures are illustrated by inner arcs.

### Figure S3. Age-related structural change maps to conserved methyl donor-binding site of Trm1.

A. Protein sequence alignment between *Pyrococcus horikoshii*, *Saccharomyces cerevisiae* and *Homo sapiens* shows high conservation in the Motif II region where LiP-peptide is located. Stars mark critical residues (Ile79 and Asp78) for methyl donor binding.



1075 **B.** Illustration of Trm1 mediated N<sup>2</sup>,N<sup>2</sup>-dimethylguanosine (m<sup>2</sup>,<sup>2</sup>G) modification at a position G<sub>26</sub>  
1076 in tRNAs.

1077  
1078 **Figure S4. Microscopic evaluation of amino acid synthesizing enzymes identifies age-related**  
1079 **polymerization of glutamate synthase Glt1.**

1080 **A.** Enrichment map of overrepresentation of age-altered proteins in amino acid metabolism. The  
1081 size of dots represents the number of proteins for every group. The color change from blue to red  
1082 signify the size of an adjusted p value (p.adj. < 0.05).

1083 **B.** GFP-tagged amino acid metabolizing enzymes (green) that appeared soluble and showed no  
1084 visible localization changes with age. Cell age in (B-D) can be determined from bud scars on cell  
1085 wall stained with calcofluor (magenta). Scale bar 1  $\mu$ m.

1086 **C.** GFP-tagged amino acid metabolizing enzymes (green) that showed punctate appearance. Scale  
1087 bar 1  $\mu$ m.

1088 **D.** Quantification of Glt1 polymers in aged cells (4 – 6 divisions) when tagged with either GFP or  
1089 mKate2 (monomeric) fluorophores. Number of polymers displayed as mean  $\pm$  SD.  $n_{(GFP)} = 82$ ,  
1090  $n_{(mKate2)} = 36$ .

1091 **E.** Representative image of aged cells expressing Glt1-GFP (green) and Hsp104-mCherry (red)  
1092 show no colocalization between Glt1 polymers (arrowhead) and age-associated aggregates. 52  
1093 cells were examined, and none displayed accumulation of Hsp104-mCherry in Glt1 polymers.  
1094 Scale bar 2  $\mu$ m.

1095  
1096 **Figure S5. Surface exposed hydrophobic residues mediate Glt1 self-assembly.**

1097 **A.** Quantification of cells with Glt1 polymers in normal (2% glucose (glc)) and glucose limitation  
1098 (0.1% glc) conditions in synthetic complete media. Error bars represent mean  $\pm$  SD from 3  
1099 biological replicates.  $n = 452$  for each group.

1100 **B.** Quantification of cells with Glt1 polymers in SD medium containing 5 g/L of (NH<sub>4</sub>)<sub>2</sub>SO<sub>4</sub> as high  
1101 nitrogen (high NH<sub>4</sub>) conditions or SD medium with twice less of yeast nitrogen base (YNB) as low  
1102 nitrogen (low NH<sub>4</sub>) conditions.  $n_{SD} = 558$ ,  $n_{High\ NH_4} = 164$ ,  $n_{Low\ NH_4} = 214$  from three biological  
1103 replicates.

1104 **C.** Validation of the effect of mutagenesis on Glt1 self-assembly. Representative images of Glt1  
1105 mutant cells. Calcofluor marks the cell wall (magenta). Scale bar 1  $\mu$ m.

1106 **D.** Western blot analysis of expression levels of Glt1 mutant proteins. Glt1-GFP was detected with  
1107 anti-GFP antibody (band size 265 kDa). Antibody against Pgc1 (45 kDa) was used as a loading  
1108 control.

1109 **E.** Quantification of relative band intensity of Glt1 mutant M3 (*GLT1-MUT*) to the WT. Bands  
1110 were normalized to the band intensity of loading control.  $n = 2$ .

1111 **F.** Schematic overview of L-glutamate synthesis in yeast which relies on two pathways: glutamate  
1112 synthase Glt1 and glutamate dehydrogenases Gdh1 and Gdh3.

1113 **G.** Catalytic activity of Glt1 mutant M3 (*GLT1-MUT*) was evaluated by growth essay on media  
1114 without glutamate in strains that were deleted of *GDH1* and *GDH3*. Glt1 mutant M3 (*GLT1-MUT*)  
1115 rescues the growth defect observed in a triple deletion ( $\Delta$ *gdh1*  $\Delta$ *gdh3*  $\Delta$ *glt1*) in a comparable  
1116 manner as WT Glt1.

1117 **H.** Localization of LiP-peptides in the cartoon model of Glt1 hexamer with dihedral symmetry  
1118 (D<sub>3</sub>) and putative assembly mechanism.

1119 **I.** Localization of LiP-peptides in the cartoon model of Glt1 trimer with cyclic symmetry (C<sub>3</sub>) and  
1120 putative assembly mechanism. Error bars represent mean  $\pm$  SD. Significance of the difference in  
1121 A-B, E) was assessed with unpaired two-tailed t test assuming equal variance. n.s. not significant.

1122

1123 **Figure S6. Glt1 polymerization mediates transcriptional changes in aged cells.**  
1124 **A.** Table summarizing number of genes with significantly age-altered expression levels between  
1125 WT and *GLT1-MUT* cells Significance of differential expression was statistically evaluated with  
1126 Wald test. ( $P$  adjusted  $< 0.05$ ),  $n = 4$ .  
1127 **B.** GO enrichment by over-representation analysis between aged WT and *GLT1-MUT* cells  
1128 showing enriched biological process in which gene expression was altered when polymerization  
1129 of Glt1 is engaged. The size of dots represents the number of proteins for every biological process.  
1130 The color change from blue to red signify the size of an adjusted p value ( $P$  adjusted  $< 0.05$ ).

1131  
1132 **Figure S7. Glt1 polymerization results in increased glutamine uptake in aged WT cells.**  
1133 **A.** Cell size distribution among aged cells with or without their budding daughters between WT  
1134 and *GLT1-MUT*. Number of cells analyzed: aged mother cells  $n = 84$ , aged mother cells with their  
1135 budding daughters  $n_{WT} = 138$   $n_{GLT1-MUT} = 130$ .  
1136 **B.** Vacuolar pH in WT and *GLT1-MUT* cells in the presence or absence of 500 nM of concA  
1137 measured by flow cytometry in cells stained with 50  $\mu$ M of 2',7'-Bis(2-carboxyethyl)-5(6)-  
1138 carboxyfluorescein acetoxymethyl ester (BCECF/AM). Biological replicates  $n = 3$ , analyzed  
1139 cells per sample  $n \geq 10000$ .  
1140 **C.** Quantification of cells with Glt1 polymers in the presence or absence of 500 nM  
1141 concanamycin A (concA). Error bars represent mean  $\pm$  SD from 3 biological replicates.  $n_{SD} =$   
1142 339,  $n_{SD\ concA} = 366$ .  
1143 **D.** Schematic overview of labelled  $^{13}C_5$ - $^{15}N_2$ -glutamine incorporation into cell metabolism.  
1144 Labelled glutamine (Gln) taken up by cells is used for glutamate (Glu) production by Glt1 and  
1145 Gdh1 and Gdh3. Glutamate can be further used for glutamine and alpha-ketoglutarate ( $\alpha$ -KG)  
1146 synthesis or for amino acid (AA) synthesis via transamination.  
1147 **E.** Fractional contribution of labelled glutamate species from Glt1 or Gdh1 and Gdh3 reactions  
1148 in young and aged cells. Squares represent parts of whole of total labelled glutamate species.  $n =$   
1149 4.  
1150 **F.** Fractional enrichment of all glutamate species in WT and *GLT1-MUT* in young and aged  
1151 cells.  $n = 4$ .  
1152 **G.** Fractional enrichment of all glutamine species in WT and *GLT1-MUT* in young and aged  
1153 cells.  $n = 4$ . Error bars represent mean  $\pm$  SD. Statistical significance in (A, C) was assessed by  
1154 two-tailer unpaired t test assuming equal variance and (F-G) with ordinary one-way ANOVA  
1155 with Dunnett's correction for multiple comparisons and B with two-way ANOVA Šidák's  
1156 correction. \* $P < 0.05$ ; \*\* $P < 0.01$ ; n.s. not significant.

1157  
1158 **Figure S8. Polymerization of Glt1 results in expression changes in general amino acid**  
1159 **transporters.**  
1160 **A.** General amino acid transporters that import glutamine Gnp1, Dip5 and Gap1 were tagged with  
1161 GFP and their expression levels in young and aged cells were measured with flow cytometry.  
1162 Heatmap summarizes fold change with age in WT and *GLT1-MUT* cells. Biological replicates  $n =$   
1163 3, analyzed cells per sample  $n \geq 10\ 000$ .  
1164 **B.** Microscopic images of Gnp1-GFP (green) in aged WT cells and *GLT1-MUT* cells. Cell age is  
1165 indicated by calcofluor staining of the cell wall (magenta). Scale bar 1  $\mu$ m.  
1166 **C.** Quantification of GFP signal from Gnp1-GFP transporter by flow cytometry between WT and  
1167 *GLT1-MUT* in young and aged cells. Error bars represent mean  $\pm$  SD. Statistical significance  
1168 was assessed with two-way ANOVA with Šidák's correction for multiple comparisons.  
1169 Biological replicates  $n = 3$ , analyzed cells per sample  $n \geq 10\ 000$ . \*\*\*\* $P < 0.0001$ .  
1170

1171 **Figure S9. Glt1 polymerization is associated with mitochondrial dysfunction at early stage**  
1172 **in replicative lifespan.**

1173 **A.** Probability of death comparison between WT and *GLT1-MUT* cells during the first 20 divisions.  
1174  $n_{wt} = 40$ ,  $n_{GLT1-MUT} = 62$ .

1175 **B.** MitoLoc enables single-cell analysis of mitochondrial function through colocalization of  
1176 mitochondrial preSU9-GFP (green) and cytosolic preCOX4-mCherry (red) signals. The import  
1177 of preCOX4, but not preSU9, depends on mitochondrial membrane potential.

1178 **C.** Mitochondrial function between WT and GLT1-MUT cells was evaluated with MitoLoc  
1179 construct and is displayed as a Pearson's correlation coefficient of colocalization between  
1180 mitochondrial peSU9-GFP and cytosolic preCOX4-mCherry. Non-polymerizing mutant maintain  
1181 stable mitochondrial function during the early stage of replicative life span (4-6 divisions).  $n_{WT} =$   
1182  $211$ ,  $n_{GLT1-MUT} = 184$ .

1183 **D.** Distribution of mitochondrial morphology in young and aged WT and Glt1 mutant cells. Pie  
1184 charts represent parts of whole of mitochondrial morphology distribution in group of cells.  $n_{WT} =$   
1185  $211$ ,  $n_{GLT1-MUT} = 184$ .

1186 **E.** Oxygen consumption in young and aged cells between WT and GLT1-MUT cells. Oxygen  
1187 consumption was measured with oxygraph in exponentially grown culture after MACS  
1188 purification of young and aged cells.  $n = 3$  biological replicates.

1189 **F.** Quantification of cells with Glt1 polymers in the presence or absence of 10  $\mu$ M carbonyl  
1190 cyanide m-chlorophenylhydrazone (CCCP), which disrupts mitochondrial membrane potential. 3  
1191 biological replicates with  $n = 100$  for each group. Error bars represent mean  $\pm$  SD. Statistical  
1192 significance (C, E) was assessed with two-way ANOVA with Šidák's correction for multiple  
1193 comparisons.  $**P < 0.01$ ;  $***P < 0.001$   $****P < 0.0001$ ; n.s. not significant.

1194  
1195 **Movie S1.**

1196 Time-lapse fluorescence microscopy of dividing yeast cells expressing endogenous Glt1 tagged  
1197 with GFP (green). Newly born daughter cells are born with diffuse Glt1. After a few divisions,  
1198 Glt1 transitions into polymeric assembly which is asymmetrically retained in the mother cells  
1199 during cell division. Images were taken every 15 min for a total period of 315 min.

1200  
1201  
1202 **References:**

- 1203 1. Jarosz, D.F., Taipale, M., and Lindquist, S. (2010). Protein homeostasis and the phenotypic  
1204 manifestation of genetic diversity: Principles and mechanisms. *Annu Rev Genet* 44, 189–216.  
1205 10.1146/annurev.genet.40.110405.090412.
- 1206 2. Nussinov, R., Tsai, C.J., and Jang, H. (2019). Protein ensembles link genotype to phenotype.  
1207 *PLoS Comput Biol* 15, 1–21. 10.1371/journal.pcbi.1006648.
- 1208 3. Cappelletti, V., Hauser, T., Piazza, I., Caflisch, A., Souza, N. de, Picotti, P., Cappelletti, V.,  
1209 Hauser, T., Piazza, I., Pepelnjak, M., et al. (2021). Dynamic 3D proteomes reveal protein  
1210 functional alterations at high resolution in situ. *Cell* 184, 545–559.  
1211 10.1016/j.cell.2020.12.021.

- 1212 4. Gnann, C., Cesnik, A.J., and Lundberg, E. (2021). Illuminating Non-genetic Cellular  
1213 Heterogeneity with Imaging-Based Spatial Proteomics. *Trends Cancer* 7, 278–282.  
1214 10.1016/j.trecan.2020.12.006.
- 1215 5. Tan, C.S.H., Go, K.D., Bisteau, X., Dai, L., Yong, C.H., Prabhu, N., Ozturk, M.B., Lim, Y.T.,  
1216 Sreekumar, L., Lengqvist, J., et al. (2018). Thermal proximity coaggregation for system-wide  
1217 profiling of protein complex dynamics in cells. *Science* (1979) 359, 1170–1177.  
1218 10.1126/science.aan0346.
- 1219 6. Bludau, I., and Aebersold, R. (2020). Proteomic and interactomic insights into the molecular  
1220 basis of cell functional diversity. *Nat Rev Mol Cell Biol* 21, 327–340. 10.1038/s41580-020-  
1221 0231-2.
- 1222 7. Aebersold, R., Agar, J.N., Amster, I.J., Baker, M.S., Bertozzi, C.R., Boja, E.S., Costello, C.E.,  
1223 Cravatt, B.F., Fenselau, C., Garcia, B.A., et al. (2018). How many human proteoforms are  
1224 there? *Nat Chem Biol* 14, 206–214. 10.1038/nchembio.2576.
- 1225 8. Porter, L.L., and Looger, L.L. (2018). Extant fold-switching proteins are widespread. *Proc*  
1226 *Natl Acad Sci U S A* 115, 5968–5973. 10.1073/pnas.1800168115.
- 1227 9. Flock, T., Weatheritt, R.J., Latysheva, N.S., and Babu, M.M. (2014). Controlling entropy to  
1228 tune the functions of intrinsically disordered regions. *Curr Opin Struct Biol* 26, 62–72.  
1229 10.1016/j.sbi.2014.05.007.
- 1230 10. Wright, P.E., and Dyson, H.J. (2015). Intrinsically disordered proteins in cellular signalling  
1231 and regulation. *Nat Rev Mol Cell Biol* 16, 18–29. 10.1038/nrm3920.
- 1232 11. Yoo, H., Triandafillou, C., and Drummond, D.A. (2019). Cellular sensing by phase  
1233 separation: Using the process, not just the products. *Journal of Biological Chemistry* 294,  
1234 7151–7159. 10.1074/jbc.TM118.001191.
- 1235 12. Alberti, S., and Hyman, A.A. (2021). Biomolecular condensates at the nexus of cellular stress,  
1236 protein aggregation disease and ageing. *Nat Rev Mol Cell Biol* 22, 196–213. 10.1038/s41580-  
1237 020-00326-6.
- 1238 13. López-Otín, C., Blasco, M.A., Partridge, L., Serrano, M., and Kroemer, G. (2013). The  
1239 hallmarks of aging. *Cell* 153, 1194. 10.1016/j.cell.2013.05.039.
- 1240 14. Dillin, A., Gottschling, D.E., and Nyström, T. (2014). The good and the bad of being  
1241 connected: The integrons of aging. *Curr Opin Cell Biol* 26, 107–112.  
1242 10.1016/j.ceb.2013.12.003.
- 1243 15. Denoth Lippuner, A., Julou, T., and Barral, Y. (2014). Budding yeast as a model organism to  
1244 study the effects of age. *FEMS Microbiol Rev* 38, 300–325. 10.1111/1574-6976.12060.

- 1245 16. Knorre, D.A., Azbarova, A. V., Galkina, K. V., Feniouk, B.A., and Severin, F.F. (2018).  
1246 Replicative aging as a source of cell heterogeneity in budding yeast. *Mech Ageing Dev* 176,  
1247 24–31. 10.1016/j.mad.2018.09.001.
- 1248 17. Janssens, G.E., and Veenhoff, L.M. (2016). Evidence for the hallmarks of human aging in  
1249 replicatively aging yeast. *Microbial Cell* 3, 263–274. 10.15698/mic2016.07.510.
- 1250 18. Neurohr, G.E., Terry, R.L., Lengefeld, J., Bonney, M., Brittingham, G.P., Moretto, F.,  
1251 Miettinen, T.P., Vaites, L.P., Soares, L.M., Paulo, J.A., et al. (2019). Excessive Cell Growth  
1252 Causes Cytoplasm Dilution And Contributes to Senescence. *Cell* 176, 1083-1097.e18.  
1253 10.1016/j.cell.2019.01.018.
- 1254 19. Leupold, S., Hubmann, G., Litsios, A., Meinema, A.C., Takhaveev, V., Papagiannakis, A.,  
1255 Niebel, B., Janssens, G., Siegel, D., and Heinemann, M. (2019). *Saccharomyces cerevisiae*  
1256 goes through distinct metabolic phases during its replicative lifespan. *Elife* 8, 1–19.  
1257 10.7554/eLife.41046.
- 1258 20. Kamei, Y., Tamada, Y., Nakayama, Y., Fukusaki, E., and Mukai, Y. (2014). Changes in  
1259 transcription and metabolism during the early stage of replicative cellular senescence in  
1260 budding yeast. *Journal of Biological Chemistry* 289, 32081–32093.  
1261 10.1074/jbc.M114.600528.
- 1262 21. McFaline-Figueroa, J.R., Vevea, J., Swayne, T.C., Zhou, C., Liu, C., Leung, G., Boldogh,  
1263 I.R., and Pon, L.A. (2011). Mitochondrial quality control during inheritance is associated with  
1264 lifespan and mother-daughter age asymmetry in budding yeast. *Aging Cell*, 885–895.  
1265 <https://doi.org/10.1111/j.1474-9726.2011.00731.x>.
- 1266 22. Hughes, A.L., and Gottschling, D.E. (2012). An early age increase in vacuolar pH limits  
1267 mitochondrial function and lifespan in yeast. *Nature* 492, 261–265. 10.1038/nature11654.
- 1268 23. Li, Y., Jiang, Y., Paxman, J., Laughlin, R.O., Klepin, S., Zhu, Y., Pillus, L., Tsimring, L.S.,  
1269 Hasty, J., and Hao, N. (2020). A programmable fate decision landscape underlies single-cell  
1270 aging in yeast. 329, 325–329. doi: 10.1126/science.aax9552.
- 1271 24. Erjavec, N., Larsson, L., Grantham, J., and Nyström, T. (2007). Accelerated aging and failure  
1272 to segregate damaged proteins in Sir2 mutants can be suppressed by overproducing the  
1273 protein aggregation-remodeling factor Hsp104p. *Genes Dev* 21, 2410–2421.  
1274 10.1101/gad.439307.
- 1275 25. Saarikangas, J., and Barral, Y. (2015). Protein aggregates are associated with replicative  
1276 aging without compromising protein quality control. *Elife* 4, 1–24. 10.7554/eLife.06197.
- 1277 26. Gladyshev, V.N., Kritchevsky, S.B., Clarke, S.G., Cuervo, A.M., Fiehn, O., Magalhães, J.P.  
1278 de, Mau, T., Maes, M., Moritz, R.L., Niedernhofer, L.J., et al. (2021). Molecular damage in  
1279 aging. *Nat Aging* 1, 1096–1106. <https://doi.org/10.1038/s43587-021-00150-3>.



- 1280 27. Sen, P., Shah, P.P., Nativio, R., and Berger, S.L. (2016). Epigenetic Mechanisms of  
1281 Longevity and Aging. *Cell* 166, 822–839. 10.1016/j.cell.2016.07.050.
- 1282 28. The Tabula Muris Consortium (2020). A single-cell transcriptomic atlas characterizes ageing  
1283 tissues in the mouse. *583*, 590–595. 10.1038/s41586-020-2496-1.
- 1284 29. Zhang, Y., Wang, J., Sang, Y., Jin, S., Wang, X., Azad, G.K., McCormick, M.A., Kennedy,  
1285 B.K., Li, Q., Wang, J., et al. (2020). Single-cell RNA-seq reveals early heterogeneity during  
1286 ageing in yeast. *bioRxiv*, 2020.09.04.282525. 10.1101/2020.09.04.282525.
- 1287 30. Janssens, G.E., Meinema, A.C., González, J., Wolters, J.C., Schmidt, A., Guryev, V.,  
1288 Bischoff, R., Wit, E.C., Veenhoff, L.M., and Heinemann, M. (2015). Protein biogenesis  
1289 machinery is a driver of replicative aging in yeast. *Elife* 4. 10.7554/eLife.08527.
- 1290 31. Martinez-Miguel, V.E., Lujan, C., Espie–Caullet, T., Martinez-Martinez, D., Moore, S.,  
1291 Backes, C., Gonzalez, S., Galimov, E.R., Brown, A.E.X., Halic, M., et al. (2021). Increased  
1292 fidelity of protein synthesis extends lifespan. *Cell Metab* 33, 2288-2300.e12.  
1293 10.1016/j.cmet.2021.08.017.
- 1294 32. Stein, K.C., Morales-Polanco, F., van der Lienden, J., Rainbolt, T.K., and Frydman, J. (2022).  
1295 Ageing exacerbates ribosome pausing to disrupt cotranslational proteostasis. *Nature* 601,  
1296 637–642. 10.1038/s41586-021-04295-4.
- 1297 33. Labbadia, J., and Morimoto, R.I. (2015). The biology of proteostasis in aging and disease.  
1298 *Annu Rev Biochem* 84, 435–464. 10.1146/annurev-biochem-060614-033955.
- 1299 34. Hipp, M.S., Kasturi, P., and Hartl, F.U. (2019). The proteostasis network and its decline in  
1300 ageing. *Nat Rev Mol Cell Biol* 20, 421–435. 10.1038/s41580-019-0101-y.
- 1301 35. Shuken, S.R., Rutledge, J., Iram, T., Losada, P.M., Wilson, E.N., Andreasson, K.I., Leib,  
1302 R.D., and Wyss-Coray, T. (2022). Limited proteolysis–mass spectrometry reveals aging-  
1303 associated changes in cerebrospinal fluid protein abundances and structures. *Nat Aging* 2,  
1304 379–388. 10.1038/s43587-022-00196-x.
- 1305 36. David, D.C., Ollikainen, N., Trinidad, J.C., Cary, M.P., Burlingame, A.L., and Kenyon, C.  
1306 (2010). Widespread protein aggregation as an inherent part of aging in *C. elegans*. *PLoS Biol*  
1307 8, 47–48. 10.1371/journal.pbio.1000450.
- 1308 37. Chen, Y.R., Harel, I., Singh, P.P., Ziv, I., Moses, E., Goshtchevsky, U., Machado, B.E.,  
1309 Brunet, A., and Jarosz, D.F. (2022). Tissue-specific landscape of protein aggregation and  
1310 quality control in an aging vertebrate. *bioRxiv*, 2022.02.26.482120.  
1311 10.1101/2022.02.26.482120.
- 1312 38. Soto, C., and Pritzkow, S. (2018). Protein misfolding, aggregation, and conformational strains  
1313 in neurodegenerative diseases. *Nat Neurosci* 21. 10.1038/s41593-018-0235-9.

- 1314 39. Henderson, K.A., and Gottschling, D.E. (2008). A mother's sacrifice: what is she keeping for  
1315 herself? *Curr Opin Cell Biol* 20, 723–728. 10.1016/j.ceb.2008.09.004.
- 1316 40. Feng, Y., De Franceschi, G., Kahraman, A., Soste, M., Melnik, A., Boersema, P.J., De  
1317 Laureto, P.P., Nikolaev, Y., Oliveira, A.P., and Picotti, P. (2014). Global analysis of protein  
1318 structural changes in complex proteomes. *Nat Biotechnol* 32, 1036+. 10.1038/nbt.2999.
- 1319 41. Schopper, S., Kahraman, A., Leuenberger, P., Feng, Y., Piazza, I., Müller, O., Boersema, P.J.,  
1320 and Picotti, P. (2017). Measuring protein structural changes on a proteome-wide scale using  
1321 limited proteolysis-coupled mass spectrometry. *Nat Protoc* 12, 2391–2410.  
1322 10.1038/nprot.2017.100.
- 1323 42. Leuenberger, P., Ganscha, S., Kahraman, A., Cappelletti, V., Boersema, P.J., Von Mering,  
1324 C., Claassen, M., and Picotti, P. (2017). Cell-wide analysis of protein thermal unfolding  
1325 reveals determinants of thermostability. *Science* (1979) 355. 10.1126/science.aai7825.
- 1326 43. Jumper, J., Evans, R., Pritzel, A., Green, T., Figurnov, M., Ronneberger, O.,  
1327 Tunyasuvunakool, K., Bates, R., Žídek, A., Potapenko, A., et al. (2021). Highly accurate  
1328 protein structure prediction with AlphaFold. *Nature* 596, 583–589. 10.1038/s41586-021-  
1329 03819-2.
- 1330 44. Wallace, E.W.J., Kear-Scott, J.L., Pilipenko, E. V., Schwartz, M.H., Laskowski, P.R., Rojek,  
1331 A.E., Katanski, C.D., Riback, J.A., Dion, M.F., Franks, A.M., et al. (2015). Reversible,  
1332 Specific, Active Aggregates of Endogenous Proteins Assemble upon Heat Stress. *Cell* 162,  
1333 1286–1298. 10.1016/j.cell.2015.08.041.
- 1334 45. Thayer, N.H., Leverich, C.K., Fitzgibbon, M.P., Nelson, Z.W., Henderson, K.A., Gafken,  
1335 P.R., Hsu, J.J., and Gottschling, D.E. (2014). Identification of long-lived proteins retained in  
1336 cells undergoing repeated asymmetric divisions. *Proceedings of the National Academy of  
1337 Sciences* 111, 14019–14026. 10.1073/pnas.1416079111.
- 1338 46. Sontag, E.M., Samant, R.S., and Frydman, J. (2017). Mechanisms and functions of ribosome-  
1339 associated protein quality control. *Annual Review of Biochemistry* 86, 97–122.  
1340 10.1038/s41580-019-0118-2.
- 1341 47. Moreno, D.F., Jenkins, K., Morlot, S., Charvin, G., Csikasz-Nagy, A., and Aldea, M. (2019).  
1342 Proteostasis collapse, a hallmark of aging, hinders the chaperone-start network and arrests  
1343 cells in G1. *Elife* 8, 1–27. 10.7554/eLife.48240.
- 1344 48. Rosenzweig, R., Nillegoda, N.B., Mayer, M.P., and Bukau, B. (2019). The Hsp70 chaperone  
1345 network. *Nat Rev Mol Cell Biol* 20, 665–680. 10.1038/s41580-019-0133-3.
- 1346 49. Zhu, X., Zhao, X., Burkholder, W.F., Gragerov, A., Ogata, C.M., Gottesman, M.E., and  
1347 Hendrickson, W.A. (1996). Structural analysis of substrate binding by the molecular  
1348 chaperone DnaK. *Science* (1979) 272, 1606–1614. 10.1126/science.272.5268.1606.

- 1349 50. Kayikci, M., Venkatakrisnan, A.J., Scott-Brown, J., Ravarani, C.N.J., Flock, T., and Babu,  
1350 M.M. (2018). Visualization and analysis of non-covalent contacts using the Protein Contacts  
1351 Atlas. *Nat Struct Mol Biol* 25, 185–194. 10.1038/s41594-017-0019-z.
- 1352 51. Nedialkova, D.D., and Leidel, S.A. (2015). Optimization of Codon Translation Rates via  
1353 tRNA Modifications Maintains Proteome Integrity. *Cell* 161, 1606–1618.  
1354 10.1016/j.cell.2015.05.022.
- 1355 52. Ihsanawati, Nishimoto, M., Higashijima, K., Shirouzu, M., Grosjean, H., Bessho, Y., and  
1356 Yokoyama, S. (2008). Crystal Structure of tRNA N2,N2-Guanosine Dimethyltransferase  
1357 Trm1 from *Pyrococcus horikoshii*. *J Mol Biol* 383, 871–884. 10.1016/j.jmb.2008.08.068.
- 1358 53. Noree, C., Sato, B.K., Broyer, R.M., and Wilhelm, J.E. (2010). Identification of novel  
1359 filament-forming proteins in *Saccharomyces cerevisiae* and *Drosophila melanogaster*. *J Cell*  
1360 *Biol* 190, 541–551. 10.1083/jcb.201003001.
- 1361 54. O’Connell, J.D., Tsechansky, M., Royall, A., Boutz, D.R., Ellington, A.D., and Marcotte,  
1362 E.M. (2014). A proteomic survey of widespread protein aggregation in yeast. *Mol Biosyst*  
1363 10, 851–861. 10.1039/c3mb70508k.
- 1364 55. Petrovska, I., Nüske, E., Munder, M.C., Kulasegaran, G., Malinowska, L., Kroschwald, S.,  
1365 Richter, D., Fahmy, K., Gibson, K., Verbavatz, J.M., et al. (2014). Filament formation by  
1366 metabolic enzymes is a specific adaptation to an advanced state of cellular starvation. *Elife*  
1367 2014, 1–19. 10.7554/eLife.02409.
- 1368 56. Shen, Q.J., Kassim, H., Huang, Y., Li, H., Zhang, J., Li, G., Wang, P.Y., Yan, J., Ye, F., and  
1369 Liu, J.L. (2016). Filamentation of Metabolic Enzymes in *Saccharomyces cerevisiae*. *Journal*  
1370 *of Genetics and Genomics* 43, 393–404. 10.1016/j.jgg.2016.03.008.
- 1371 57. Cottevieille, M., Larquet, E., Jonic, S., Petoukhov, M. V., Caprini, G., Paravisi, S., Svergun,  
1372 D.I., Vanoni, M.A., and Boisset, N. (2008). The subnanometer resolution structure of the  
1373 glutamate synthase 1.2-MDa hexamer by cryoelectron microscopy and its oligomerization  
1374 behavior in solution: Functional implications. *Journal of Biological Chemistry* 283, 8237–  
1375 8249. 10.1074/jbc.M708529200.
- 1376 58. Garcia-Seisdedos, H., Empereur-Mot, C., Elad, N., and Levy, E.D. (2017). Proteins evolve  
1377 on the edge of supramolecular self-assembly. *Nature* 548, 244–247. 10.1038/nature23320.
- 1378 59. Park, C.K., and Horton, N.C. (2019). Structures, functions, and mechanisms of filament  
1379 forming enzymes: a renaissance of enzyme filamentation. *Biophys Rev* 11, 927–994.  
1380 10.1007/s12551-019-00602-6.
- 1381 60. Montrose, K., Lopez Cabezas, R.M., Paukstyte, J., and Saarikangas, J. (2020). Winter is  
1382 coming : Regulation of cellular metabolism by enzyme polymerization in dormancy and  
1383 disease. *Exp Cell Res* 397. 10.1016/j.yexcr.2020.112383.

- 1384 61. Hughes, C.E., Coody, T.K., Jeong, M.Y., Berg, J.A., Winge, D.R., and Hughes, A.L. (2020).  
1385 Cysteine Toxicity Drives Age-Related Mitochondrial Decline by Altering Iron Homeostasis.  
1386 *Cell* 180, 296-310.e18. 10.1016/j.cell.2019.12.035.
- 1387 62. Zhu, X., Garrett, J., Schreve, J., and Michaeli, T. (1996). GNP1, the high affinity glutamine  
1388 permease of *S. cerevisiae*. *Curr Genet* 30, 107–114. 10.1007/s002940050108.
- 1389 63. Kaya, A., Phua, C.Z.J., Lee, M., Wang, L., Tyshkovskiy, A., Ma, S., Barre, B., Liu, W.,  
1390 Harrison, B.R., Zhao, X., et al. (2021). Evolution of natural lifespan variation and molecular  
1391 strategies of extended lifespan in yeast. *Elife* 10, 1–28. 10.7554/eLife.64860.
- 1392 64. Vowinckel, J., Hartl, J., Butler, R., and Ralser, M. (2015). MitoLoc: A method for the  
1393 simultaneous quantification of mitochondrial network morphology and membrane potential  
1394 in single cells. *Mitochondrion* 24, 77–86. 10.1016/j.mito.2015.07.001.
- 1395 65. Schlissel, G., Krzyzanowski, M.K., Caudron, F., Barral, Y., and Rine, J. (2017). Aggregation  
1396 of the Whi3 protein, not loss of heterochromatin, causes sterility in old yeast cells. *Science*  
1397 (1979) 355, 1184–1187. 10.1126/science.aaj2103.
- 1398 66. Garcia-Seisdedos, H., Villegas, J.A., and Levy, E.D. (2019). Infinite Assembly of Folded  
1399 Proteins in Evolution, Disease, and Engineering. *Angewandte Chemie - International Edition*  
1400 58, 5514–5531. 10.1002/anie.201806092.
- 1401 67. Mouton, S.N., Thaller, D.J., Crane, M.M., Rempel, I.L., Terpstra, O.T., Steen, A., Kaeberlein,  
1402 M., Lusk, C.P., Boersma, A.J., and Veenhoff, L.M. (2020). A physicochemical perspective  
1403 of aging from single-cell analysis of pH, macromolecular and organellar crowding in yeast.  
1404 *Elife*, e54707. <https://doi.org/10.7554/elife.54707>.
- 1405 68. Correia-Melo, C., Kamrad, S., Messner, C.B., Tengölics, R., Herrera-Dominguez, L.,  
1406 Townsend, S.J., Alam, M.T., Freiwald, A., Campbell, K., Aulakh, S., et al. (2022). Cell-cell  
1407 metabolite exchange creates a pro-survival metabolic environment that extends lifespan.  
1408 *bioRxiv*, 2022.03.07.483228. 10.1101/2022.03.07.483228.
- 1409 69. Clay, L., Caudron, F., Denoth-Lippuner, A., Boettcher, B., Frei, S.B., Snapp, E.L., and Barral,  
1410 Y. (2014). A sphingolipid-dependent diffusion barrier confines ER stress to the yeast mother  
1411 cell. *Elife* 2014, 1–23. 10.7554/eLife.01883.
- 1412 70. Santra, M., Dill, K.A., and De Graff, A.M.R. (2019). Proteostasis collapse is a driver of cell  
1413 aging and death. *Proc Natl Acad Sci U S A* 116, 22173–22178. 10.1073/pnas.1906592116.
- 1414 71. Colman-lerner, A., Chin, T.E., and Brent, R. (2001). Yeast Cbk1 and Mob2 Activate  
1415 Daughter-Specific Genetic Programs to Induce Asymmetric Cell Fates. 107, 739–750.  
1416 [https://doi.org/10.1016/s0092-8674\(01\)00596-7](https://doi.org/10.1016/s0092-8674(01)00596-7).
- 1417 72. Ghaemmaghami, S., Huh, W.K., Bower, K., Howson, R.W., Belle, A., Dephoure, N., O’Shea,  
1418 E.K., and Weissman, J.S. (2003). Global analysis of protein expression in yeast. *Nature* 425,  
1419 737–741. 10.1038/nature02046.

- 1420 73. Thul, P.J., Akesson, L., Wiking, M., Mahdessian, D., Geladaki, A., Ait Blal, H., Alm, T.,  
1421 Asplund, A., Björk, L., Breckels, L.M., et al. (2017). A subcellular map of the human  
1422 proteome. *Science* (1979) 356, eaal3321. 10.1126/science.aal3321.
- 1423 74. Bertelsen, E.B., Chang, L., Gestwicki, J.E., and Zuiderweg, E.R.P. (2009). Solution  
1424 conformation of wild-type *E. coli* Hsp70 (DnaK) chaperone complexed with ADP and  
1425 substrate. *Proc Natl Acad Sci U S A* 106, 8471–8476. 10.1073/pnas.0903503106.
- 1426 75. Brachmann, C.B., Davies, A., Cost, G.J., Caputo, E., Li, J., Hieter, P., and Boeke, J.D. (1998).  
1427 Designer deletion strains derived from *Saccharomyces cerevisiae* S288C: A useful set of  
1428 strains and plasmids for PCR-mediated gene disruption and other applications. *Yeast* 14, 115–  
1429 132. 10.1002/(SICI)1097-0061(19980130)14:2<115::AID-YEA204>3.0.CO;2-2.
- 1430 76. Lindstrom, D.L., and Gottschling, D.E. (2009). The mother enrichment program: A genetic  
1431 system for facile replicative life span analysis in *Saccharomyces cerevisiae*. *Genetics* 183,  
1432 413–422. 10.1534/genetics.109.106229.
- 1433 77. Lequin, S., Chassagne, D., Bellat, J.-P., Huh, W., Falvo, J. V., Gerke, L.C., Carroll, A.S.,  
1434 Howson, R.W., Weissman, J.S., and Shea, E.K.O. (2003). Global analysis of protein  
1435 localization in budding yeast. *Nature* 425, 686–691. 10.1038/nature02026.
- 1436 78. Winzeler, E.A., Shoemaker, D.D., Astromoff, A., Liang, H., Anderson, K., Andre, B.,  
1437 Bangham, R., Benito, R., Boeke, J.D., Bussey, H., et al. (1999). Functional characterization  
1438 of the *S. cerevisiae* genome by gene deletion and parallel analysis. *Science* (1979) 285, 901–  
1439 906. 10.1126/science.285.5429.901.
- 1440 79. Janke, C., Magiera, M.M., Rathfelder, N., Taxis, C., Reber, S., Maekawa, H., Moreno-  
1441 Borchart, A., Doenges, G., Schwob, E., Schiebel, E., et al. (2004). A versatile toolbox for  
1442 PCR-based tagging of yeast genes: New fluorescent proteins, more markers and promoter  
1443 substitution cassettes. *Yeast* 21, 947–962. 10.1002/yea.1142.
- 1444 80. Newby, G.A., Kiriakov, S., Hallacli, E., Liebman, S.W., Lindquist, S., Khalil, A.S., Newby,  
1445 G.A., Kiriakov, S., Hallacli, E., Kayatekin, C., et al. (2017). Resource A Genetic Tool to  
1446 Track Protein Aggregates and Control Prion Inheritance Resource A Genetic Tool to Track  
1447 Protein Aggregates and Control Prion Inheritance. *Cell*, 1–14. 10.1016/j.cell.2017.09.041.
- 1448 81. Laughery, M.F., Shumaker, T., Hunter, T., Brown, A., Hoopes, J., Ostbye, T., and Wyrick,  
1449 J.J. (2015). New Vectors for Simple and Streamlined CRISPR-Cas9 Genome Editing in  
1450 *Saccharomyces cerevisiae*. *Yeast* 32, 711–720. 10.1002/yea.3098.New.
- 1451 82. Huang, F., Spangler, J.R., and Huang, A.Y. (2017). In vivo cloning of up to 16 kb plasmids  
1452 in *E. coli* is as simple as PCR. *PLoS One* 12, 1–21. 10.1371/journal.pone.0183974.
- 1453 83. Pettersen, E.F., Goddard, T.D., Huang, C.C., Meng, E.C., Couch, G.S., Croll, T.I., Morris,  
1454 J.H., and Ferrin, T.E. (2021). UCSF ChimeraX: Structure visualization for researchers,  
1455 educators, and developers. *Protein Science* 30, 70–82. 10.1002/pro.3943.



- 1456 84. Goddard, T.D., Huang, C.C., Meng, E.C., Pettersen, E.F., Couch, G.S., Morris, J.H., and  
1457 Ferrin, T.E. (2018). UCSF ChimeraX: Meeting modern challenges in visualization and  
1458 analysis. *Protein Science* 27, 14–25. 10.1002/pro.3235.
- 1459 85. Kityk, R., Kopp, J., Sinning, I., and Mayer, M.P. (2012). Structure and Dynamics of the ATP-  
1460 Bound Open Conformation of Hsp70 Chaperones. *Mol Cell* 48, 863–874.  
1461 10.1016/j.molcel.2012.09.023.
- 1462 86. Waterhouse, A., Bertoni, M., Bienert, S., Studer, G., Tauriello, G., Gumienny, R., Heer, F.T.,  
1463 De Beer, T.A.P., Rempfer, C., Bordoli, L., et al. (2018). SWISS-MODEL: Homology  
1464 modelling of protein structures and complexes. *Nucleic Acids Res* 46, W296–W303.  
1465 10.1093/nar/gky427.
- 1466 87. Tsai, J., Taylor, R., Chothia, C., and Gerstein, M. (1999). The packing density in proteins:  
1467 Standard radii and volumes. *J Mol Biol* 290, 253–266. 10.1006/jmbi.1999.2829.
- 1468 88. Alings, F., Sarin, L.P., Fufezan, C., Drexler, H.C.A., and Leidel, S.A. (2015). An evolutionary  
1469 approach uncovers a diverse response of tRNA 2-thiolation to elevated temperatures in yeast.  
1470 *Rna* 21, 202–212. 10.1261/rna.048199.114.
- 1471 89. Sarin, L.P., Kienast, S.D., Leufken, J., Ross, R.L., Dziergowska, A., Debiec, K., Sochacka,  
1472 E., Limbach, P.A., Fufezan, C., Drexler, H.C.A., et al. (2018). Nano LC-MS using capillary  
1473 columns enables accurate quantification of modified ribonucleosides at low femtomol levels.  
1474 *Rna* 24, 1403–1417. 10.1261/rna.065482.117.
- 1475 90. Gregorova, P., Sipari, N.H., and Sarin, L.P. (2021). Broad-range RNA modification analysis  
1476 of complex biological samples using rapid C18-UPLC-MS. *RNA Biol* 18, 1382–1389.  
1477 10.1080/15476286.2020.1853385.
- 1478 91. Storey, J.D., and Tibshirani, R. (2003). Statistical significance for genomewide studies. *Proc*  
1479 *Natl Acad Sci U S A* 100, 9440–9445. 10.1073/pnas.1530509100.
- 1480 92. Chavali, S., Chavali, P.L., Chalancon, G., De Groot, N.S., Gemayel, R., Latysheva, N.S., Ing-  
1481 Simmons, E., Verstrepen, K.J., Balaji, S., and Babu, M.M. (2017). Constraints and  
1482 consequences of the emergence of amino acid repeats in eukaryotic proteins. *Nat Struct Mol*  
1483 *Biol* 24, 765–777. 10.1038/nsmb.3441.
- 1484 93. Chatr-Aryamontri, A., Breitkreutz, B.J., Heinicke, S., Boucher, L., Winter, A., Stark, C.,  
1485 Nixon, J., Ramage, L., Kolas, N., O'Donnell, L., et al. (2013). The BioGRID interaction  
1486 database: 2013 Update. *Nucleic Acids Res* 41, 816–823. 10.1093/nar/gks1158.
- 1487 94. Benschop, J.J., Brabers, N., van Leenen, D., Bakker, L. V., van Deutekom, H.W.M., van  
1488 Berkum, N.L., Apweiler, E., Lijnzaad, P., Holstege, F.C.P., and Kemmeren, P. (2010). A  
1489 Consensus of Core Protein Complex Compositions for *Saccharomyces cerevisiae*. *Mol Cell*  
1490 38, 916–928. 10.1016/j.molcel.2010.06.002.

- 1491 95. Liti, G., Carter, D.M., Moses, A.M., Warringer, J., Parts, L., James, S.A., Davey, R.P.,  
1492 Roberts, I.N., Burt, A., Koufopanou, V., et al. (2009). Population genomics of domestic and  
1493 wild yeasts. *Nature* 458, 337–341. [10.1038/nature07743](https://doi.org/10.1038/nature07743).
- 1494 96. Newman, J.R.S., Ghaemmaghani, S., Ihmels, J., Breslow, D.K., Noble, M., DeRisi, J.L., and  
1495 Weissman, J.S. (2006). Single-cell proteomic analysis of *S. cerevisiae* reveals the architecture  
1496 of biological noise. *Nature* 441, 840–846. [10.1038/nature04785](https://doi.org/10.1038/nature04785).
- 1497 97. Arava, Y., Wang, Y., Storey, J.D., Liu, C.L., Brown, P.O., and Herschlag, D. (2003).  
1498 Genome-wide analysis of mRNA translation profiles in *Saccharomyces cerevisiae*. *Proc Natl*  
1499 *Acad Sci U S A* 100, 3889–3894. [10.1073/pnas.0635171100](https://doi.org/10.1073/pnas.0635171100).
- 1500 98. Tacutu, R., Thornton, D., Johnson, E., Budovsky, A., Barardo, Di., Craig, T., DIana, E.,  
1501 Lehmann, G., Toren, D., Wang, J., et al. (2018). Human Ageing Genomic Resources: New  
1502 and updated databases. *Nucleic Acids Res* 46, D1083–D1090. [10.1093/nar/gkx1042](https://doi.org/10.1093/nar/gkx1042).
- 1503 99. McCormick, M.A., Delaney, J.R., Tsuchiya, M., Tsuchiyama, S., Shemorry, A., Sim, S.,  
1504 Chou, A.C.Z., Ahmed, U., Carr, D., Murakami, C.J., et al. (2015). A Comprehensive Analysis  
1505 of Replicative Lifespan in 4,698 Single-Gene Deletion Strains Uncovers Conserved  
1506 Mechanisms of Aging. *Cell Metab* 22, 895–906. [10.1016/j.cmet.2015.09.008](https://doi.org/10.1016/j.cmet.2015.09.008).
- 1507 100. Albu, R.F., Chan, G.T., Zhu, M., Wong, E.T.C., Taghizadeh, F., Hu, X., Mehran, A.E.,  
1508 Johnson, J.D., Gsponer, J., and Mayor, T. (2015). A feature analysis of lower solubility  
1509 proteins in three eukaryotic systems. *J Proteomics* 118, 21–38. [10.1016/j.jprot.2014.10.011](https://doi.org/10.1016/j.jprot.2014.10.011).
- 1510 101. Jain, S., Wheeler, J.R., Walters, R.W., Agrawal, A., Barsic, A., and Parker, R. (2016).  
1511 ATPase-Modulated Stress Granules Contain a Diverse Proteome and Substructure. *Cell* 164,  
1512 487–498. [10.1016/j.cell.2015.12.038](https://doi.org/10.1016/j.cell.2015.12.038).
- 1513 102. Giaever, G., Chu, A.M., Ni, L., Connelly, C., Riles, L., Veronneau, S., Dow, S., Lucau-  
1514 Danila, A., Anderson, K., Andre, B., et al. (2002). Functional profiling of the *Saccharomyces*  
1515 *cerevisiae* genome. *Nature* 418, 387–391. <https://doi.org/10.1038/nature00935>.

1516

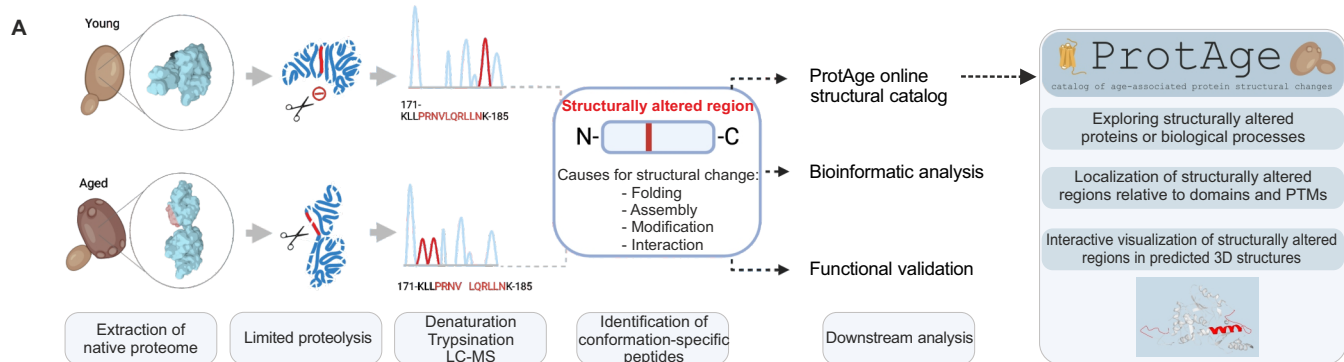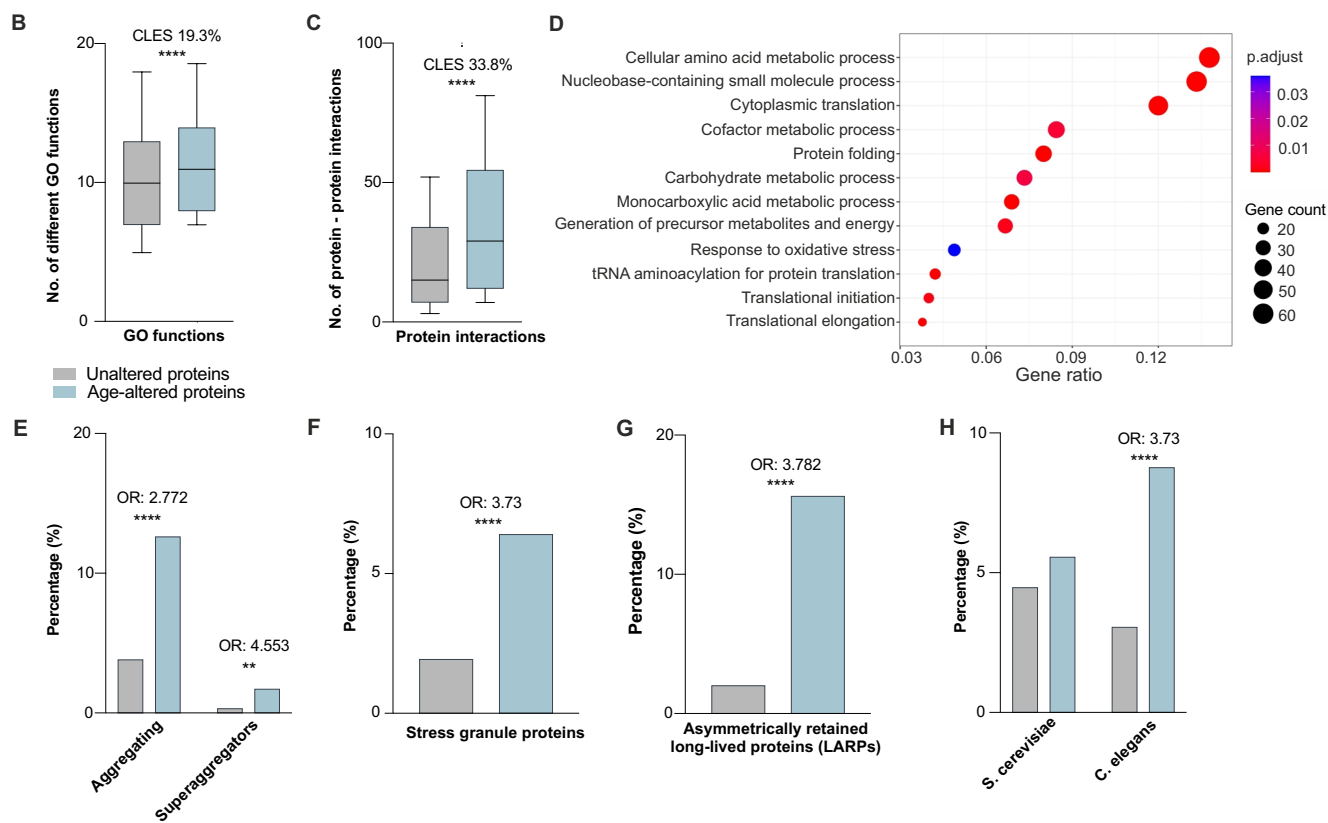

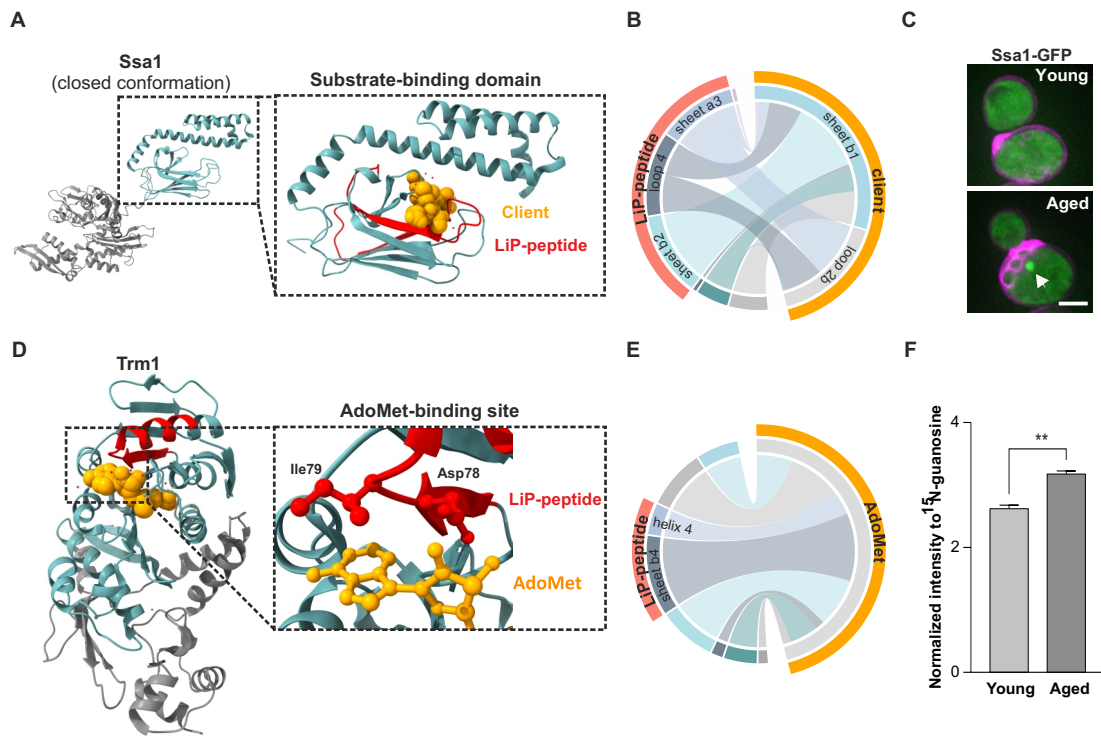

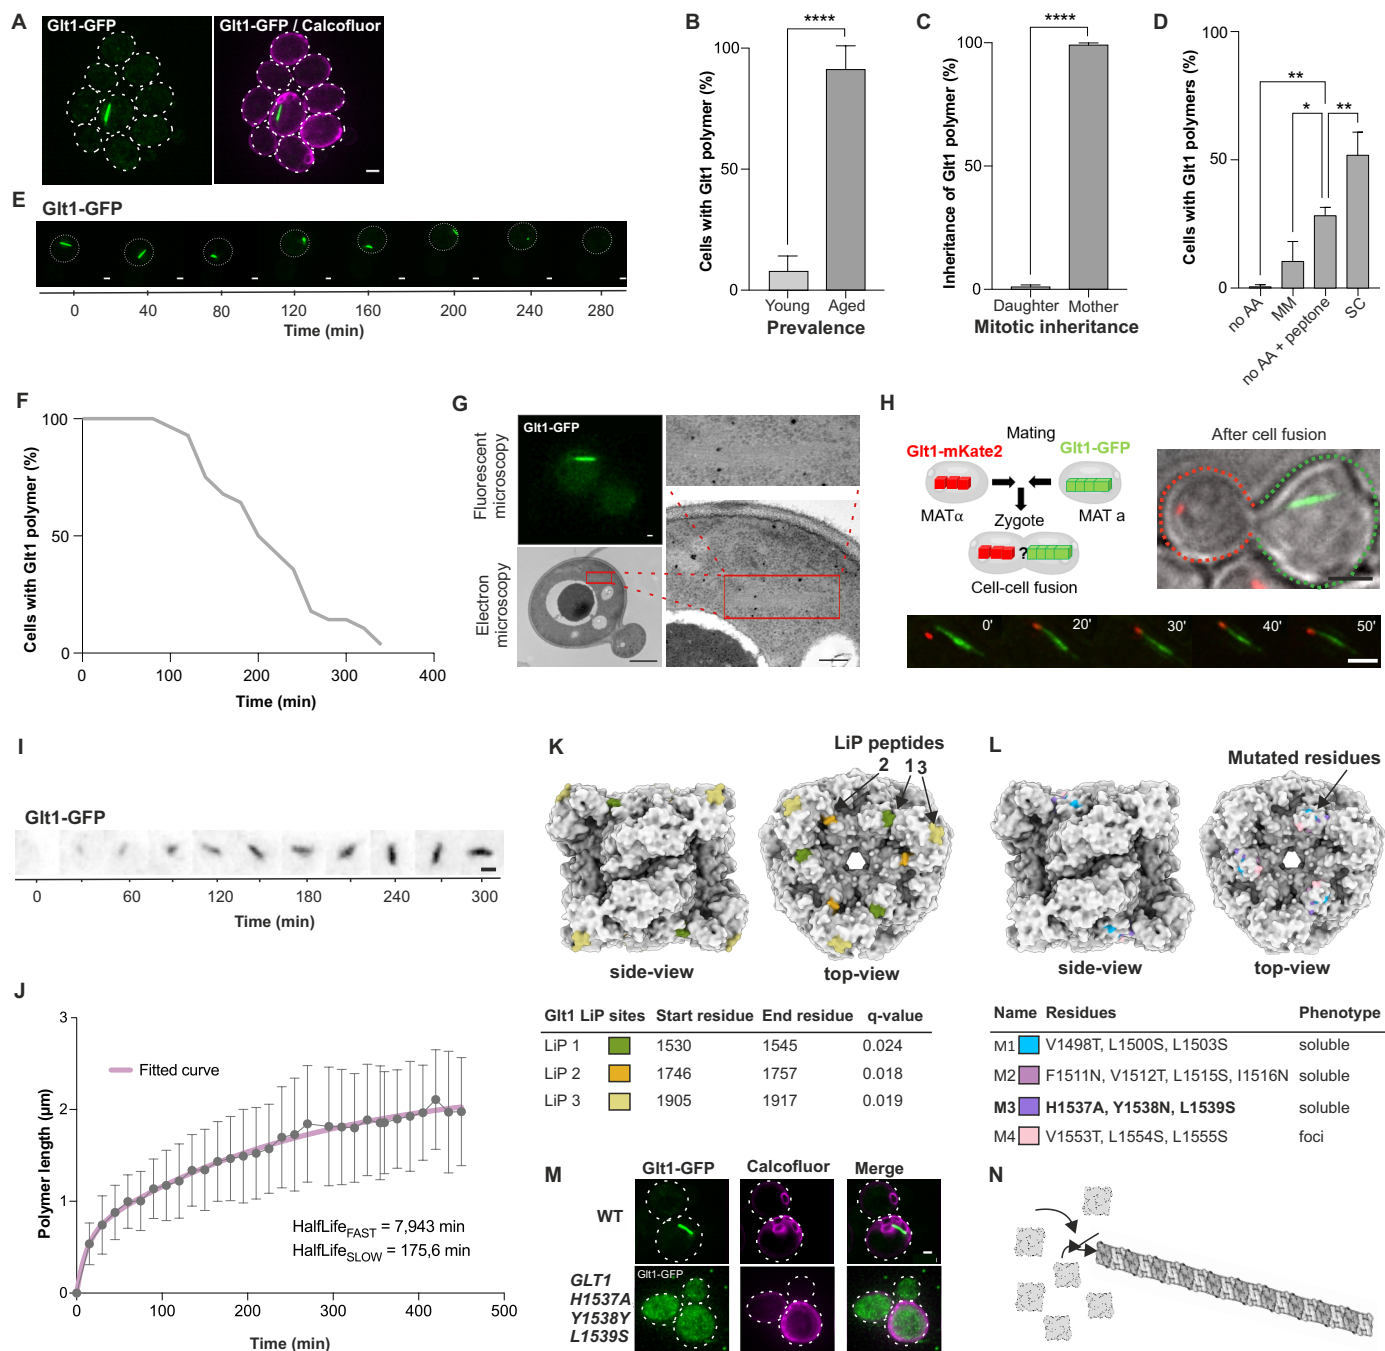



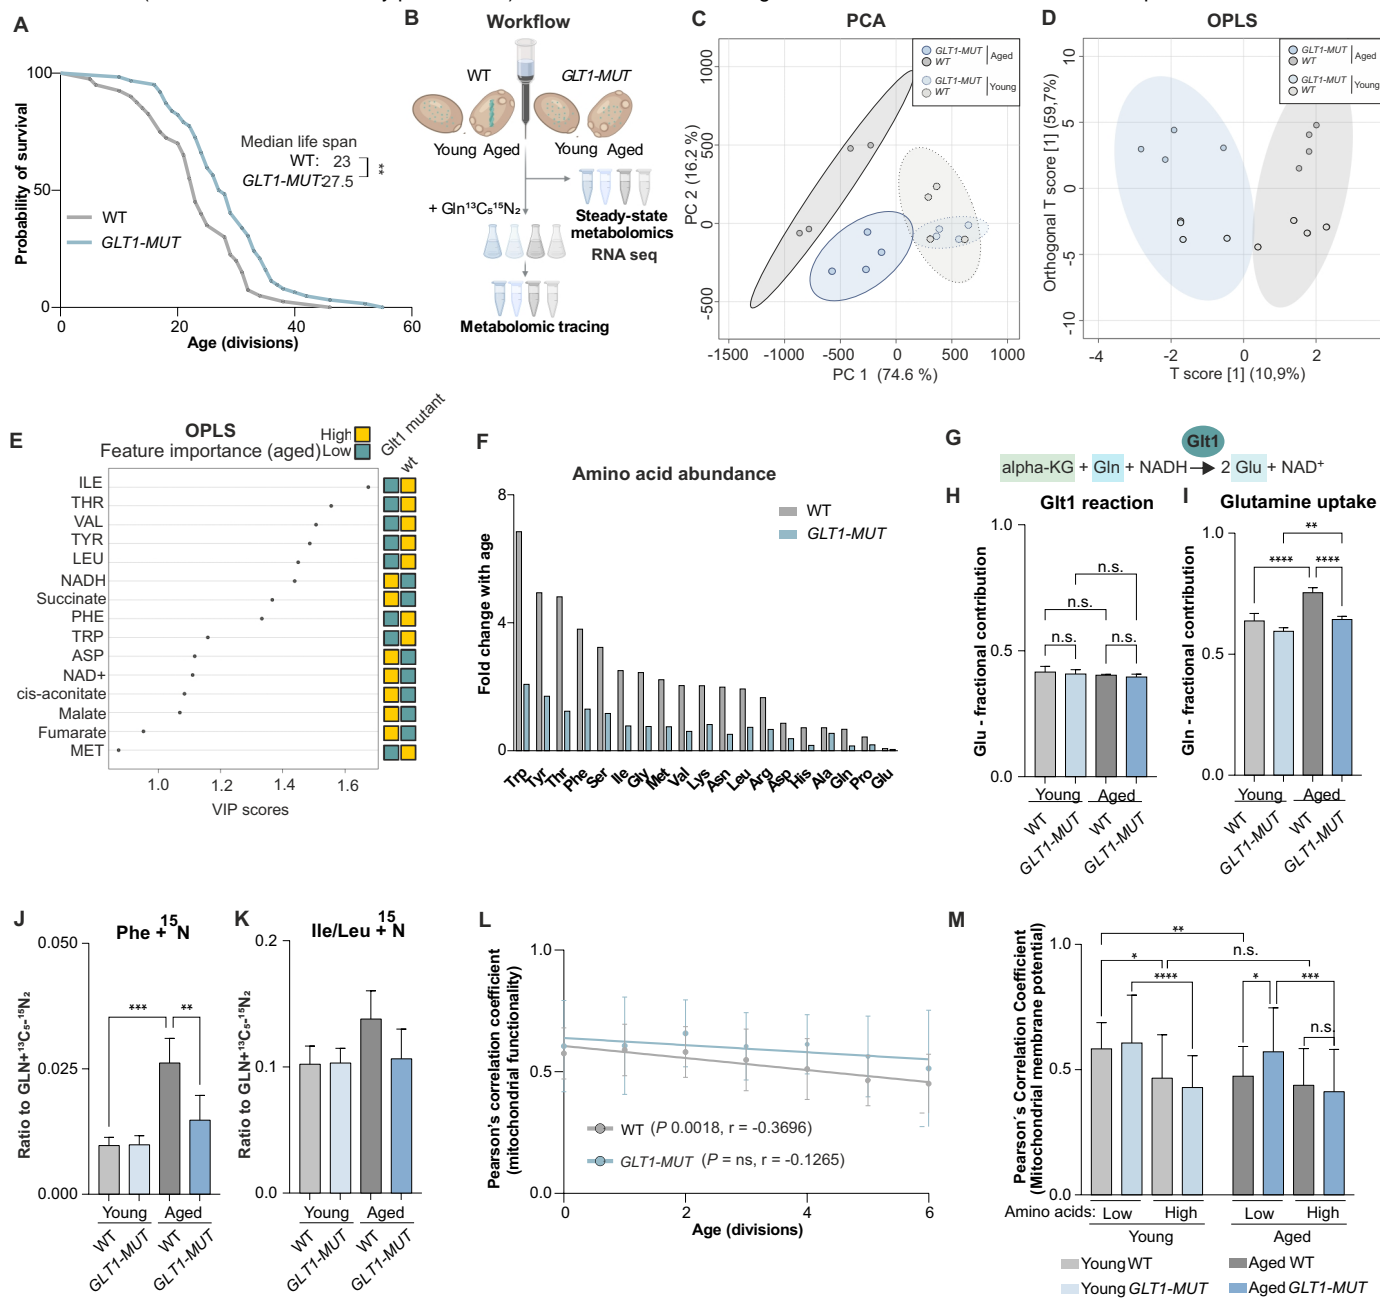

Source: https://www.biorxiv.org/content/10.1101/2023.01.23.524173v1.full.pdf
